# Genetic contributions to variation in human stature in prehistoric Europe

Samantha L. Cox<sup>a</sup>, Christopher B. Ruff<sup>b</sup>, Robert M. Maier<sup>c,d,e</sup> & Iain Mathieson<sup>a,1</sup>

<sup>a</sup> Department of Genetics, Perelman School of Medicine, University of Pennsylvania, Philadelphia PA.

<sup>b</sup> Center for Functional Anatomy and Evolution, Johns Hopkins University School of Medicine, Baltimore MD.

<sup>c</sup> Program in Medical and Population Genetics, Broad Institute of MIT and Harvard, Cambridge, MA 02142, USA

<sup>d</sup> Stanley Center for Psychiatric Research, Broad Institute of MIT and Harvard, Cambridge, MA 02142, USA

<sup>e</sup> Analytical and Translational Genetics Unit, Massachusetts General Hospital, Boston, MA 02114, USA

<sup>1</sup> Correspondence to [mathi@penmedicine.upenn.edu](mailto:mathi@penmedicine.upenn.edu)

## 11 Abstract

12 The relative contributions of genetics and environment to temporal and geographic variation in  
13 human height remain largely unknown. Ancient DNA has identified changes in genetic ancestry  
14 over time, but it is not clear whether those changes in ancestry are associated with changes in  
15 height. Here, we directly test whether changes over the past 38,000 years in European height  
16 predicted using DNA from 1071 ancient individuals are consistent with changes observed in  
17 1159 skeletal remains from comparable populations. We show that the observed decrease in  
18 height between the Early Upper Paleolithic and the Mesolithic is qualitatively predicted by  
19 genetics. Similarly, both skeletal and genetic height remained constant between the Mesolithic  
20 and Neolithic and increased between the Neolithic and Bronze Age. Sitting height changes  
21 much less than standing height—consistent with genetic predictions—although genetics predicts  
22 a small Bronze Age increase that is not observed in skeletal remains. Geographic variation in  
23 stature is also qualitatively consistent with genetic predictions, particularly with respect to  
24 latitude. We find that the changes in genetic height between the Neolithic and Bronze Age may  
25 be driven by polygenic adaptation. Finally, we hypothesize that an observed decrease in genetic  
26 heel bone mineral density in the Neolithic reflects adaptation to the decreased mobility  
27 indicated by decreased femoral bending strength. This study provides a model for interpreting  
28 phenotypic changes predicted from ancient DNA and demonstrates how they can be combined  
29 with phenotypic measurements to understand the relative contribution of genetic and  
30 developmentally plastic responses to environmental change.

## 31 Introduction

32 Stature, or standing height, is one of the most heavily studied human phenotypes. It is easy to  
33 measure in living individuals and relatively straightforward to estimate from skeletal remains.  
34 As a consequence, geographic variation and temporal changes in stature are well documented  
35 (1-3), particularly in western Europe, where there is a comprehensive record of prehistoric  
36 changes (4). The earliest anatomically modern humans in Europe, present by 42-45,000 BP (5,  
37 6), were relatively tall (mean adult male height in the Early Upper Paleolithic was ~174 cm).  
38 Mean male stature then declined from the Paleolithic to the Mesolithic (~164 cm) before  
39 increasing to ~167 cm by the Bronze Age (4, 7). Subsequent changes, including the 20<sup>th</sup> century  
40 secular trend increased height to ~170-180 cm (1, 4). It is broadly agreed that these changes are  
41 likely to have been driven by a combination of environmental (e.g. climate or diet) and genetic  
42 factors (4, 7-9), although the effects of these two variables cannot be separated based on  
43 skeletal data alone. In this study, by combining the results of genome-wide association studies  
44 (GWAS) with ancient DNA, we directly estimate the genetic component of stature and test  
45 whether population-level skeletal changes between ~35,000 and 1,000 BP are consistent with  
46 those predicted by genetics.

47  
48 Height is highly heritable (10-14), and therefore amenable to genetic analysis by genome-wide  
49 association studies (GWAS). With sample sizes of hundreds of thousands of individuals, GWAS  
50 have identified thousands of genomic variants that are significantly associated with the  
51 phenotype (15-17). Though the individual effect of each of these variants is tiny (on the order of  
52 +/- 1-2mm per variant (18)), their combination can be highly predictive. Polygenic risk scores  
53 (PRS) constructed by summing together the effects of all height-associated variants carried by  
54 an individual can now explain upwards of 30% of the phenotypic variance in populations of  
55 European ancestry (16). In effect, the PRS can be thought of as an estimate of “genetic height”  
56 that predicts phenotypic height, at least in populations closely related to those in which the  
57 GWAS was performed. One major caveat is that the predictive power of PRS is much lower in  
58 other populations (19). The extent to which differences in PRS between populations are  
59 predictive of population-level differences in phenotype is currently unclear (20). Recent studies

60 have demonstrated that such differences may partly be artifacts of correlation between  
61 environmental and genetic structure in the original GWAS (21, 22). These studies also  
62 suggested best practices for PRS comparisons, including the use of GWAS summary statistics  
63 from large homogenous studies (instead of meta-analyses), and replication of results using  
64 summary statistics derived from within-family analyses that are robust to population  
65 stratification.

66

67 Bearing these caveats in mind, PRS can be applied to ancient populations thanks to recent  
68 technological developments that have dramatically increased ancient DNA (aDNA) sample sizes.  
69 These have provided remarkable insights into the demographic and evolutionary history of both  
70 modern and archaic humans across the world (23-25), particularly in Europe, and allow us to  
71 track the evolution of variants underlying phenotypes ranging from pigmentation to diet (26-  
72 29). In principle, PRS applied to ancient populations could similarly allow us to make inference  
73 about the evolution of complex traits. A few studies have used PRS to make predictions about  
74 the relative statures of ancient populations (29-31) but looked at only a few hundred samples in  
75 total and did not compare their predictions with stature measured from skeletons. Here, we  
76 compare measured skeletal data to genetic predictions and directly investigate the genetic  
77 contribution to height independent of environmental effects acting during development.

## 78 Results

### 79 PRS and skeletal measurements

80 We collected published aDNA data from 1071 ancient individuals from Western Eurasia (west of  
81 50° E), dated to between 38,000 and 1100 years before present (BP) (27, 29, 30, 32-57). Using  
82 GWAS summary statistics for height from the UK Biobank (generated and made available by the  
83 Neale lab: <http://nealelab.is/>), we computed height PRS for each individual, using a P-value  
84 cutoff of  $10^{-6}$ , clumping variants in 250kb windows, and replacing missing genotypes with the  
85 mean across individuals (Methods). We refer to this as PRS(GWAS). Because of concerns about  
86 GWAS effect sizes being inflated by residual population stratification, we also computed a PRS  
87 where we used GWAS P-values to select SNPs, but computed the PRS using effect sizes

88 estimated from a within-family test for ~17,000 sibling pairs from UK Biobank (Methods) which  
89 we refer to as PRS(GWAS/Sibs), and which should be unaffected by stratification. We also  
90 obtained stature estimates from 1159 individuals dating to between 33,700 and 1100 BP taken  
91 from a larger dataset of 2177 individuals with stature and body proportion estimates from  
92 substantially complete skeletons (4, 58). There is limited overlap in these datasets (12  
93 individuals), but they cover the same time periods and broadly the same geographic locations  
94 (Supplementary Fig. 1), although the genetic data contain more individuals from further east  
95 (30-50° E) compared to the skeletal data. We divided these individuals into five groups based  
96 on date: Early Upper Paleolithic (>25,000 BP; EUP), Late Upper Paleolithic (25,000-11,000 BP;  
97 LUP), Mesolithic (11,000-5500 BP), Neolithic (8500-3900 BP) and post-Neolithic (5000-1100 BP,  
98 including the Copper and Bronze Ages, plus later periods). These groups broadly correspond to  
99 transitions in both archaeological culture and genetic ancestry (33, 38, 59), and we resolved  
100 individuals in the overlapping periods using either archaeological or genetic context (Methods).

101

#### 102 Trends in PRS for height are largely consistent with trends in skeletal stature

103 We found a significant effect of group (time period) on mean PRS(GWAS) (ANOVA  $P=1.9\times 10^{-9}$ ),  
104 PRS(GWAS/Sibs) ( $P=0.045$ ) and skeletal stature ( $P=2.8\times 10^{-11}$ ). There was no evidence of  
105 difference between LUP, Mesolithic and Neolithic groups (Supplementary Fig. 2a-b), so we  
106 merged these three groups (we refer to the merged group as LUP-Neolithic). We find that  
107 PRS(GWAS) in the LUP-Neolithic period is 0.47 standard deviations (SD) lower than in the EUP  
108 ( $P=0.002$ ), and 0.40 SD lower ( $P=8.7\times 10^{-11}$ ) than in the post-Neolithic period (Fig. 1a).  
109 PRS(GWAS/Sib) shows a very similar pattern (Fig. 1b), demonstrating that this is not a result of  
110 differential relatedness of the ancient individuals to the structured present-day GWAS  
111 populations. Skeletal stature shows a qualitatively similar pattern to the genetic predictions,  
112 with a 1.5 SD (9.6cm;  $P=2.9\times 10^{-7}$ ) difference between EUP and LUP-Neolithic and a 0.27 SD  
113 (1.8cm;  $P=3.6\times 10^{-5}$ ) difference between LUP-Neolithic and post-Neolithic. Broad patterns of  
114 change in stature over time are therefore consistent with genetic predictions.

115

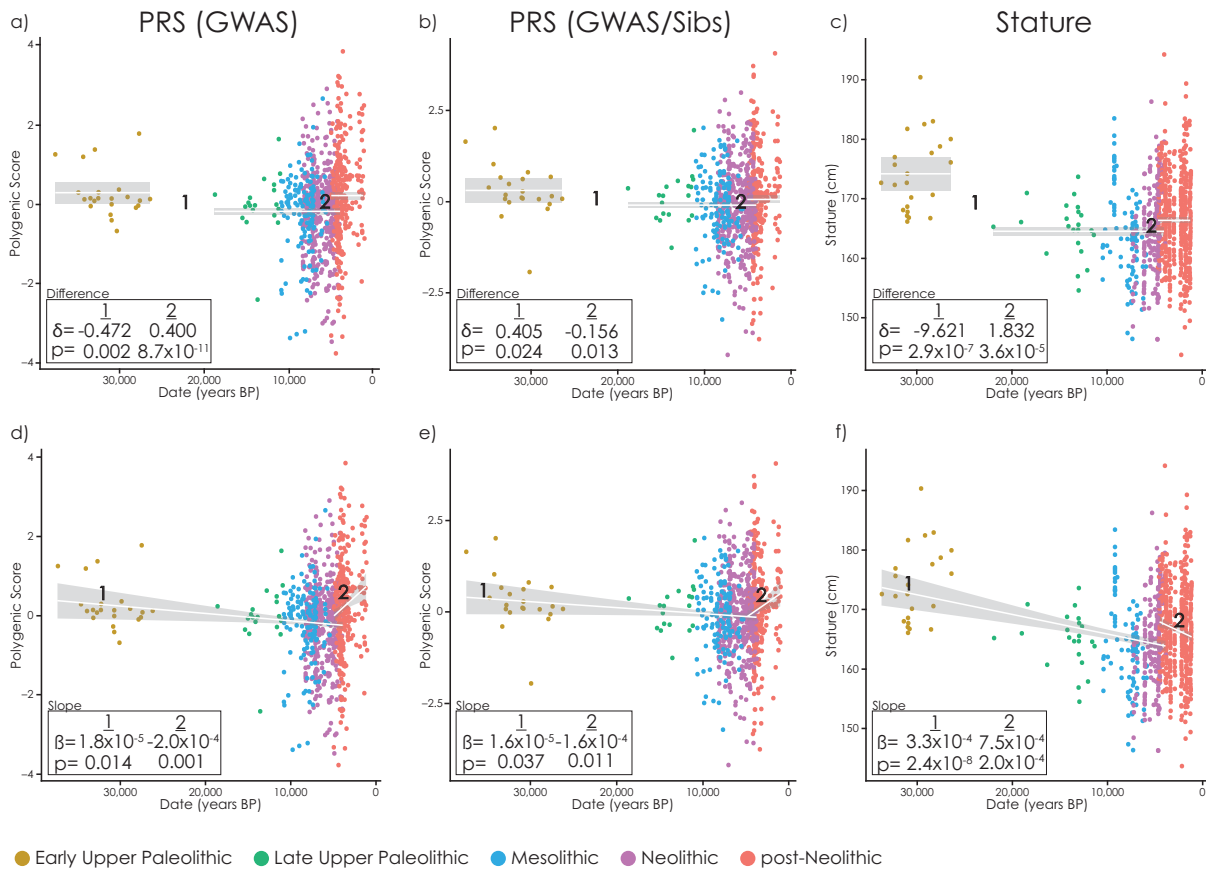

**Figure 1:** Changes in standing height PRS and stature through time. Each point is an ancient individual, white lines show fitted values, grey area is the 95% confidence interval, and boxes show parameter estimates and p-values for difference in means ( $\delta$ ) and slopes ( $\beta$ ). **a-c)** PRS(GWAS) (a), PRS(GWAS/Sibs) (b) and skeletal stature (c) with constant values in the EUP, LUP-Neolithic and post-Neolithic. **d-e)** PRS(GWAS) (d), PRS(GWAS/Sibs) (e) and skeletal stature (f) showing a linear trend between EUP and Neolithic and a different trend in the post-Neolithic.

116 Additionally, we fit a piecewise linear model allowing PRS to decrease from the EUP to the  
117 Neolithic and then increase and change slope in the post-Neolithic (Fig. 1d-f). In this model,  
118 PRS(GWAS) decreases by about  $1.8 \times 10^{-5}$  SD/year ( $P=0.014$ ) from EUP to Neolithic, and increases  
119 by  $2.0 \times 10^{-4}$  SD/year ( $P=0.001$ ) post-Neolithic (Fig. 1d). PRS(GWAS/sib) decreases by about  
120  $1.6 \times 10^{-5}$  SD/year ( $P=0.037$ ) from EUP to Neolithic, then increases by  $1.6 \times 10^{-4}$  SD/year  
121 throughout the period ( $P=0.011$ ; Fig. 1e). Again, these changes are qualitatively consistent with  
122 changes in stature (Fig. 1f), with a  $4.7 \times 10^{-5}$  SD/year ( $3.3 \times 10^{-4}$  cm/year;  $P=2.4 \times 10^{-8}$ ) decrease  
123 from EUP to Mesolithic, and an increase of  $\sim 0.5$  SD into the Neolithic. However, in this model  
124 stature, unlike PRS, actually decreases during the post-Neolithic period ( $7.5 \times 10^{-4}$  cm/year;  
125  $P=2.0 \times 10^{-4}$ ).

126  
127 To further explore these trends, we fitted a broader range of piecewise linear models to both  
128 datasets (Methods; Supplementary Table 1; Supplementary Fig. 3-5). In the most general model  
129 we allowed both the mean and the slope of PRS or stature with respect to time to vary between  
130 groups. More constrained models fix some of these parameters to zero—eliminating change  
131 over time—or merging two adjacent groups. We compared the fit of these nested models using  
132 Akaike's Information Criterion (AIC, Supplementary Table 1). The linear model in Fig. 1d-f is one  
133 of the best models in this analysis. In general, all the best-fitting models support the pattern—  
134 for both PRS and measured stature—of a decrease between the EUP and Mesolithic and an  
135 increase between the Neolithic and post-Neolithic (Supplementary Fig. 3-5). Some models  
136 suggest that the increase in stature—but not PRS—may have started during the Neolithic  
137 (Supplementary Figure 5a-c). Finally, we confirmed that these results were robust to different  
138 constructions of the PRS—using 100kb and 500kb clustering windows rather than 250kb  
139 (Supplementary Fig. 6-7).

140

#### 141 [Sitting height PRS is partially consistent with trends in body proportions](#)

142 Standing height is made up of two components: leg length and sitting height (made up of the  
143 length of the trunk, neck and head), with a partially overlapping genetic basis (60). Throughout  
144 European prehistory, changes in leg length tended to be larger than changes in sitting height

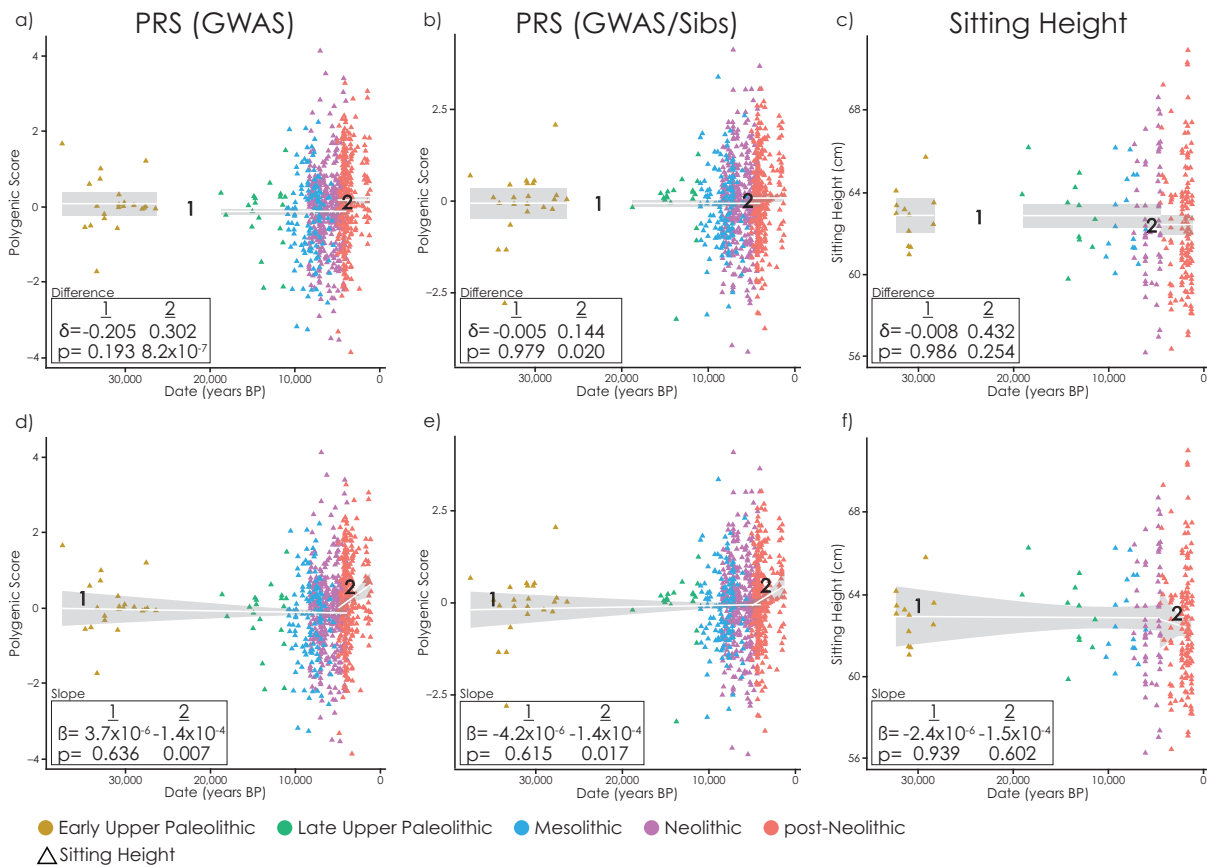

**Figure 2:** Changes in sitting height PRS and sitting height through time. Each point is an ancient individual, lines show fitted values, grey area is the 95% confidence interval, and boxes show parameter estimates and p-values for difference in means ( $\delta$ ) and slopes ( $\beta$ ). **a-c**) PRS(GWAS) (a), PRS(GWAS/Sibs) (b) and skeletal sitting height, with constant values in the EUP, LUP-Neolithic and post-Neolithic. **d-e**) PRS(GWAS) (d), PRS(GWAS/Sibs) (e) and skeletal sitting height showing a linear trend between EUP and Neolithic and a different trend in the post-Neolithic.



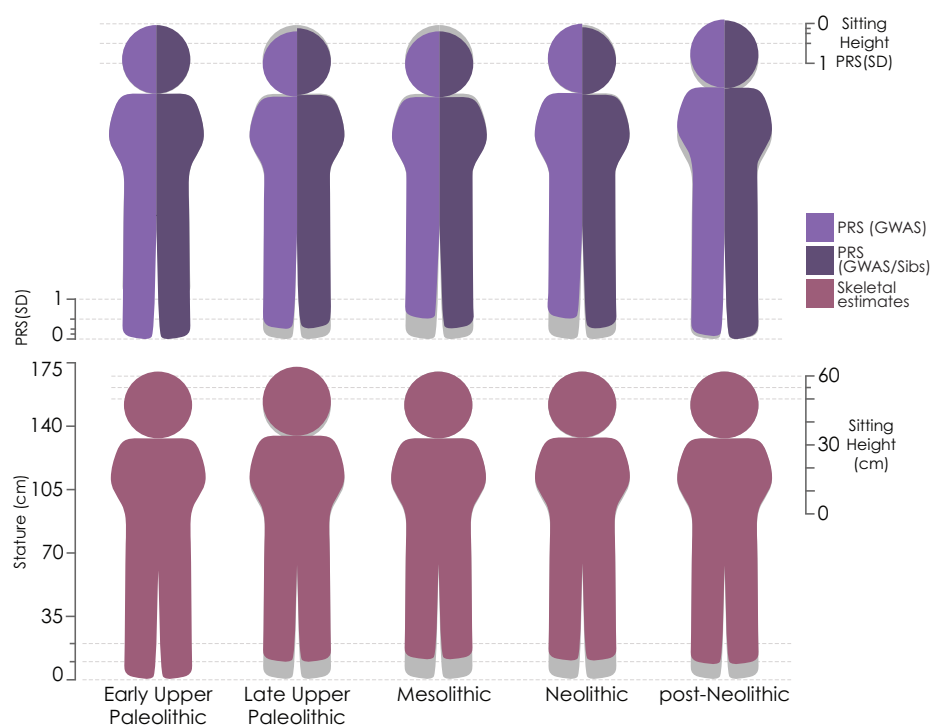

**Figure 3:** Changes in standing height and sitting height predicted using PRS (relative changes; upper row) and measured from skeletons (absolute values; lower row). Y-axes on the left represent changes in standing height and on the right represent changes in sitting height. Note that changes in PRS are exaggerated compared to the total height of the figures.

145 (4). We constructed PRS(GWAS) and PRS(GWAS/Sibs) for sitting height and analyzed them in  
146 the same way as standing height (Fig. 2). In contrast to standing height, we find no evidence of  
147 change between the EUP and Neolithic. Both PRS(GWAS) and PRS(GWAS/Sibs) do increase,  
148 either between the Neolithic and post-Neolithic, or during the post-Neolithic period (Fig. 2a,b,d  
149 & e). On the other hand, using only skeletons with complete torsos to estimate sitting height,  
150 we find no evidence of change in any period. Thus, the skeletal data are consistent with the  
151 genetic data for the EUP-Neolithic period, but inconsistent in the post-Neolithic period, where  
152 PRS predicts an increase that is not reflected in the skeletons. This could be because of more  
153 limited skeletal measurements (only 236 out of 1159 skeletons are sufficiently complete to  
154 estimate sitting height directly), because the change in PRS is artefactual, it is being buffered by  
155 non-genetic effects, or by opposing genetic effects which we do not capture. Overall, we find  
156 mixed consistency between PRS and skeletal measurements (Fig. 3). The decrease in standing  
157 but not sitting height between the EUP and Neolithic is consistent in both, as is the increase in  
158 standing height between the Neolithic and post-Neolithic. However, PRS predicts a continued  
159 increase in stature through the post-Neolithic period that is not seen in skeletal remains.

160

#### 161 [Geographic variation in standing height](#)

162 As well as varying through time, human stature is stratified by geography, with trends related  
163 to both longitude and latitude (61). North-South trends following Allen's (62) and Bergmann's  
164 (63) rules are most often interpreted as environmental adaptations to the polar-equatorial  
165 climate gradient. Today, Northern Europeans are generally taller than Southern Europeans (1),  
166 a pattern which emerged between the Mesolithic and post-Neolithic (4, 7). Longitudinal  
167 variation within Europe is present during the Mesolithic (64), though these trends are difficult  
168 to interpret due to sampling bias across the time period (4). We therefore tested whether  
169 geographic variation in PRS could explain these geographic trends, as it partially explains  
170 temporal trends.

171

172 We regressed the residuals from our fitted linear height model (the model shown in Fig. 1d-f)  
173 on longitude and latitude. Stature increases significantly with latitude ( $P=1.2\times 10^{-10}$ ) in the post-

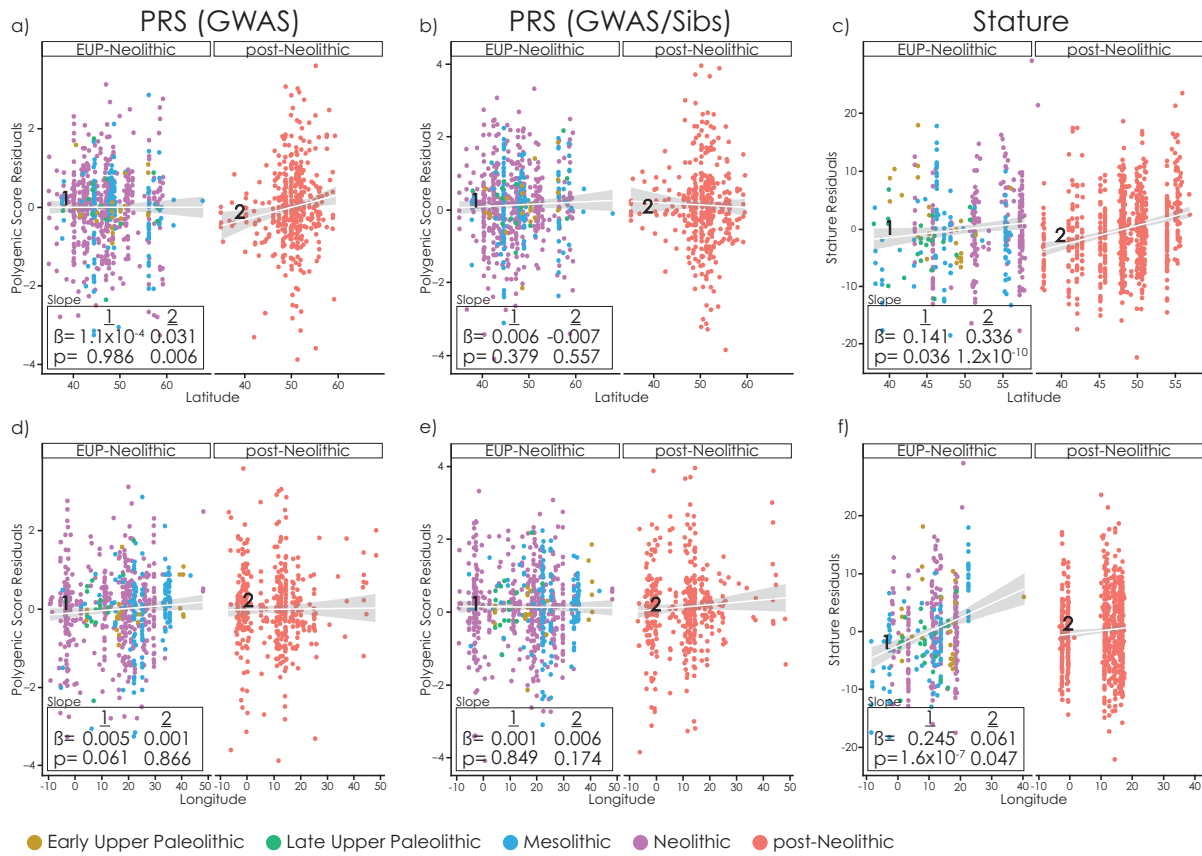

**Figure 4:** Geographic variation in PRS and skeletal standing height. Residuals for the linear height model (Fig. 1 d-f) against **a-c)** latitude and **d-f)** longitude. Each point is an ancient individual, lines show fitted values, grey area is the 95% confidence interval, and boxes show parameter estimates ( $\beta$ ) and p-values for slopes.

174 Neolithic period. PRS(GWAS) increases in the post-Neolithic ( $P=0.006$ ) although this is not  
175 replicated by PRS(GWAS/Sibs) ( $P=0.557$ ). PRS does not increase significantly with latitude in the  
176 EUP-Neolithic period. There is some evidence of a modest trend in stature in the EUP-Neolithic  
177 period (Fig. 4c). However, there is only evidence for this in the Neolithic, not in the EUP-  
178 Mesolithic (Supplementary Fig. 8a). Further, because time and geography are correlated in our  
179 Neolithic sample, this can also be explained by a temporal increase during the Neolithic, in  
180 which case there is no geographic trend (Supplementary Fig. 8b).

181  
182 In contrast to latitude, there is a significant increasing trend of stature with longitude before  
183 but not during the Neolithic ( $0.36$  cm/degree  $P=1.6\times 10^{-7}$ ; Fig. 4, Supplementary Fig. 8c). This  
184 may be partly driven by a small number of samples from a single site, but still persists if these  
185 samples are removed ( $0.20$  standardized residuals per degree,  $P=0.004$ ; Supplementary Fig. 8d).  
186 There is little or no trend ( $0.06$  cm/degree;  $P=0.047$ ) in the post-Neolithic period (Figure 4f). We  
187 find no evidence for longitudinal clines in PRS. In summary, we find that stature increases with  
188 latitude in the post-Neolithic, possibly in the Neolithic, but not before. This cline may have a  
189 genetic basis. Stature also increases with longitude, particularly in the Mesolithic, but this cline  
190 is not predicted by genetics.

191  
192 [Correlated changes in bone density PRS and femoral bending strength](#)

193 Beyond stature, we wanted to investigate the utility of using PRS to interpret other measurable  
194 phenotypes in ancient individuals. Decreased mobility through time, associated with large-scale  
195 lifestyle transitions between hunting-gathering, agriculture, and ultimately modern  
196 industrialism, is well documented through declines in lower limb bone diaphyseal strength and  
197 trabecular density (4, 65, 66). Today, heel bone mineral density (hBMD) is often used as an  
198 indicator of general activity levels in younger people (67) and of osteoporosis in older  
199 individuals (68, 69); UK Biobank has GWAS data for this trait, indirectly estimated by  
200 ultrasound. However, evaluating differences in BMD in archaeological and paleontological  
201 specimens can be problematic. In the short term soil leaches bone minerals, while later the  
202 bone begins to fossilize, leading to unpredictable patterns of density in ancient remains (70)

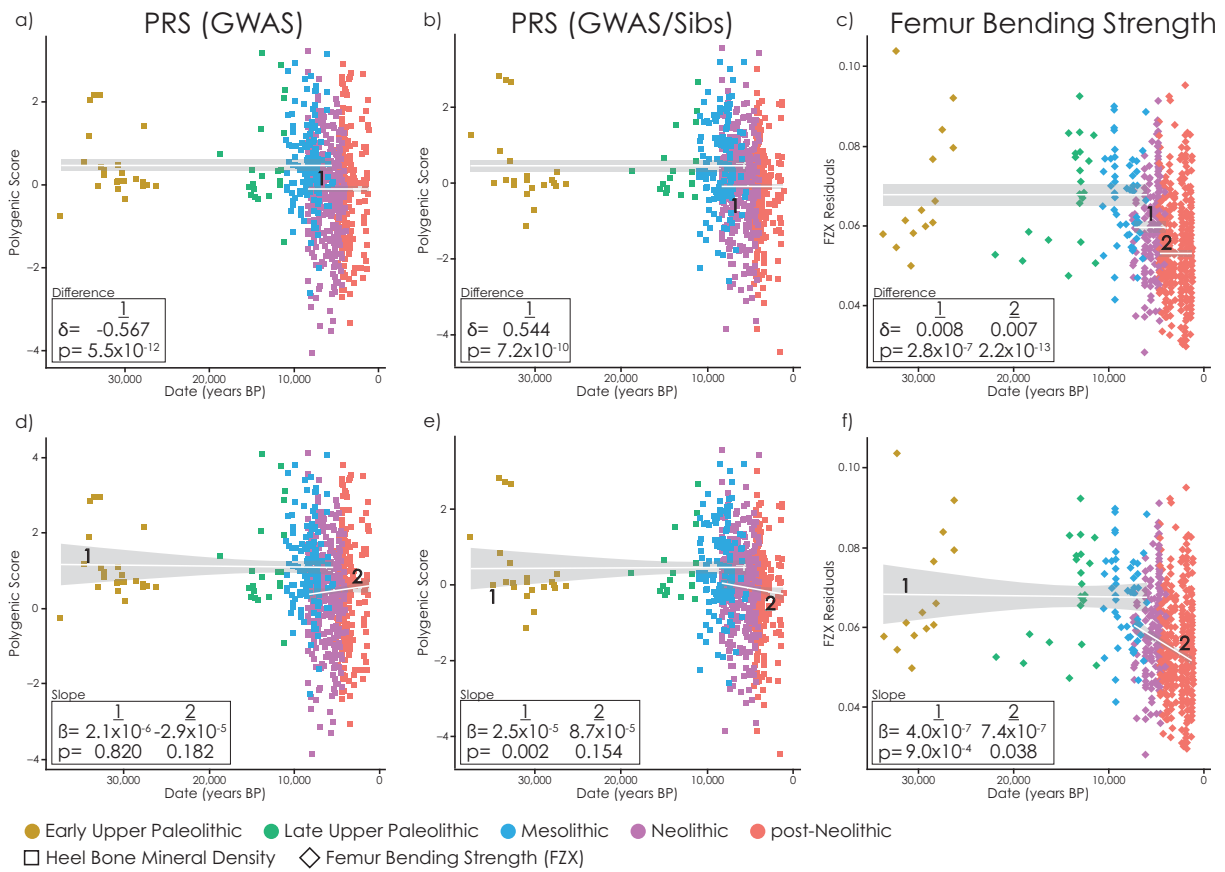

**Figure 5:** Changes in heel bone mineral density (hBMD) PRS and femur bending strength (FZx) through time. Each point is an ancient individual, lines show fitted values, grey area is the 95% confidence interval, and boxes show parameter estimates and p-values for difference in means ( $\delta$ ) and slopes ( $\beta$ ). **a-b**) PRS(GWAS) (a) and PRS(GWAS/Sibs) (b) for hBMD, with constant values in the EUP-Mesolithic and Neolithic-post-Neolithic. **c**) FZx constant in the EUP-Mesolithic, Neolithic and post-Neolithic. **d-e**) PRS(GWAS) (d) and PRS(GWAS/Sibs) (e) for hBMD showing a linear trend between EUP and Mesolithic and a different trend in the Neolithic-post-Neolithic. **f**) FZx with a linear trend between EUP and Mesolithic and a different trend in the Neolithic-post-Neolithic.

203 and requiring special processing methods (65) that are difficult to apply to large samples.  
204 However, femoral diaphyseal bending strength can be calculated from bone cross-sectional  
205 geometric measurements that are not as affected by bone preservation (71). Here we focus on  
206 anteroposterior bending strength (section modulus) of the midshaft femur (FZx), which has  
207 been linked specifically to mobility (72). Since both trabecular density and diaphyseal strength  
208 should respond to mobility and activity levels, we reasoned that they would be likely to show  
209 correlated patterns of temporal change. Following established protocols (71), we standardized  
210 FZx first by sex, then the product of estimated body mass and femoral length (4).  
211 Qualitatively, PRS(GWAS) and FZx show similar patterns, decreasing through time (Fig. 5,  
212 Supplementary Figure 1g-i). There is a significant drop in FZx (Figure 5c) from the Mesolithic to  
213 Neolithic ( $P=1.2\times 10^{-8}$ ) and again from the Neolithic to post-Neolithic ( $P=1.5\times 10^{-13}$ ). PRS(GWAS)  
214 for hBMD decreases significantly from the Mesolithic to Neolithic (Figure 5a;  $P=5.5\times 10^{-12}$ ),  
215 which is replicated in PRS(GWAS/Sibs) ( $P=7.2\times 10^{-10}$ ; Figure 5b); neither PRS shows evidence of  
216 decrease between the Neolithic and post-Neolithic. We hypothesize that both FZx and hBMD  
217 responded to the reduction in mobility that accompanied the adoption of agriculture (72). In  
218 particular, the lower genetic hBMD and skeletal FZx of Neolithic compared to Mesolithic  
219 populations may represent adaptation to the same change in environment although we do not  
220 know the extent to which the change in FZx was driven by genetic or plastic developmental  
221 response to environmental change. On the other hand, FZx continues to decrease between the  
222 Neolithic and post-Neolithic (Fig. 5c,f)—which is not reflected in the hBMD PRS (Fig. 5 a-b,d-e).  
223 One possibility is that the two phenotypes responded differently to the post-Neolithic  
224 intensification of agriculture. Another is that the non-genetic component of hBMD, which we  
225 do not capture here, also continued to decrease.

226

### 227 [Are changes in PRS driven by selection or genetic drift?](#)

228 We tested whether there was evidence for selection on any of these traits, by computing the  $Q_x$   
229 statistic (73) for increasing numbers of SNPs from each PRS, with effect sizes taken from either  
230 PRS(GWAS) (Fig. 6a-c) or PRS(GWAS/Sibs) (Fig. 6d-f). We computed the statistic between each  
231 pair of adjacent time periods, and over all time periods. We estimated empirical P-values by

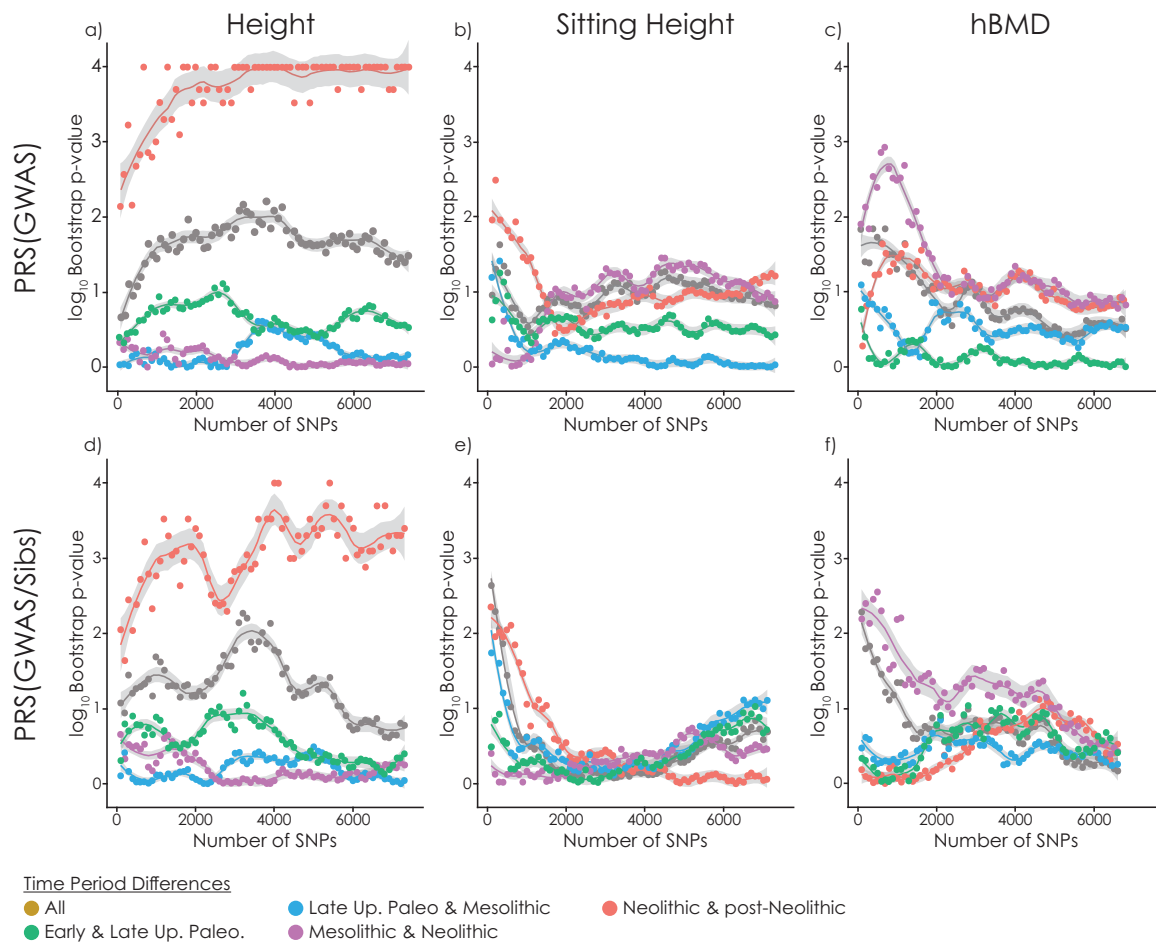

**Figure 6:** Signals of selection on standing height, sitting height and bone mineral density. We plot the log<sub>10</sub> bootstrap P-values for the  $Q_x$  statistics (y-axis, capped at 4) for GWAS signals (top row) and GWAS/Sibs (bottom row). We tested each pair of adjacent populations, and the combination of all of them (“All”). We ordered PRS SNPs by increasing P-value and tested the significance of  $Q_x$  for increasing numbers of SNPs (x-axis).

232 sampling random frequency-matched SNPs from across the genome. Using GWAS effect sizes,  
233 we find selection between the Neolithic and Post-Neolithic for stature ( $P < 1 \times 10^{-4}$ ; Fig. 6a),  
234 which replicates using effect sizes estimated within siblings ( $10^{-4} < P < 10^{-2}$ ; Fig. 6d). The fact that  
235 the signal is less strong for GWAS/Sibs than for GWAS could either indicate that some of the  
236 signal is driven by stratification (21, 22), or that the power to detect selection for smaller effect  
237 sizes is lower when using the noisier sibling effect sizes. We tested this by generating GWAS  
238 results on a subsample of individuals, chosen so that the standard error of the effect sizes was  
239 equal to those of the within-sibling effects. This produced similar results to the analysis using  
240 the within-sibling effects (Supplementary Fig. 9), suggesting that the main reason for the  
241 weaker signal is the reduction in sample size of the within-sibling analysis.

242  
243 For sitting height, we find little evidence of selection in any time period ( $P < 10^{-2}$ ). We conclude  
244 that there was most likely selection for increased standing but not sitting height in the Steppe  
245 ancestors of Bronze Age European populations, as previously proposed (29). One potential  
246 caveat is that, although we re-estimated effect sizes within siblings, we still used the GWAS  
247 results to identify SNPs to include. This may introduce some subtle confounding, which remains  
248 a question for future investigation. Finally, using GWAS effect sizes, we identify some evidence  
249 of selection on heel BMD between when comparing Mesolithic and Neolithic populations ( $10^{-3} < P < 10^{-2}$ ; Fig. 6c). However, this signal is relatively weak when using within-sibling effect sizes,  
250 and disappears when we include more than about 2000 SNPs.

## 252 Discussion

253 We showed that the well-documented temporal and geographic trends in stature in Europe  
254 between the Early Upper Paleolithic and the post-Neolithic period are broadly consistent with  
255 those that would be predicted by polygenic risk scores (PRS) computed using present-day  
256 GWAS results combined with ancient DNA. However, because of the limited predictive power of  
257 current PRS, we cannot provide a quantitative estimate of how much of the variation in  
258 phenotype between populations might be explained by variation in PRS. Similarly, we cannot  
259 say whether the changes were continuous, reflecting evolution through time, or discrete,



260 reflecting changes associated with known episodes of replacement or admixture of populations  
261 that have diverged genetically over time. Finally, we find cases where predicted genetic  
262 changes are discordant with observed phenotypic changes—emphasizing the role of  
263 developmental plasticity in response to environmental change and the difficulty in interpreting  
264 differences in PRS in the absence of phenotypic data.

265  
266 Our results indicate two major episodes of genetic change. First, there was a reduction in  
267 stature PRS—but not sitting height PRS—between the Early Upper Paleolithic and Neolithic.  
268 These genetic changes are consistent with the decrease in stature—driven by leg length—  
269 observed in skeletons during this time period (4, 64, 74, 75). This evolutionary change could  
270 have been adaptive, driven by changes in resource availability (76) or to a colder climate (61).  
271 Early Upper Paleolithic populations in Europe would have migrated relatively recently from  
272 more southern latitudes and had body proportions that are typical of present-day tropical  
273 populations (75). It is therefore plausible that they adapted to the colder climate of northern  
274 latitudes throughout the Upper Paleolithic. Comparison between patterns of phenotypic and  
275 genetic variation suggest that, on a broad scale, variation in body proportions among present-  
276 day people reflects adaptation to environment largely along latitudinal gradients (77, 78). On  
277 the other hand, we do not find genetic evidence for selection on stature during this time  
278 period—although with a small sample size we likely have very low power to detect it. Further,  
279 the populations of Early Upper Paleolithic, Late Upper Paleolithic, Mesolithic and Neolithic  
280 Europe are substantially discontinuous and deeply diverged genetically (33, 59). For example  
281 the ancestors of Mesolithic and Neolithic Europeans are estimated to have diverged ~46,000 BP  
282 (40). Therefore, if these genetic changes do reflect adaptation to climate, this adaptation must  
283 have occurred at least partly independently in the ancestors of these populations.

284  
285 The second episode of genetic change is either between the Neolithic and post-Neolithic, or  
286 during the post-Neolithic period. In genome-wide ancestry, this transition is characterized by  
287 the eastward movement of substantial amounts of “Steppe ancestry” into Central and Western  
288 Europe (27, 30, 38, 50). Our results are thus consistent with previous results that Bronze Age

289 populations of the Eurasian steppe had been selected for increased height and that migration  
290 and admixture of these populations with Neolithic European populations increased genetic  
291 height in Europe (29, 30). There is no obvious climatic driver for this adaptation but one  
292 possibility is that it represents adaptation to a change in social environment. Y chromosome  
293 phylogenies suggests an increase in male reproductive variance at this time (29, 48, 50, 79, 80).  
294 Culturally, the Bronze Age is characterized by increased social stratification (81) and the  
295 introduction of patriarchal Indo-European culture (82). Perhaps these social changes implied  
296 increased competition for resources and consequent selection for greater body size. The  
297 geographic gradient of increasing skeletal stature is unclear in the Paleolithic, largely West-East  
298 in the Mesolithic (7, 64) and largely South-North by the Bronze Age (4, 7, 9). Latitudinal, but not  
299 longitudinal, patterns are qualitatively consistent with geographic patterns in PRS suggesting  
300 that, like temporal variation, both genetics and environment contribute to geographic variation.

301  
302 There is a major confounding factor in analysis of temporal and geographic variation in PRS,  
303 particularly in the Bronze Age. Genetic population structure in present-day Europe is correlated  
304 with geography (83) and largely driven by variation in proportions of Steppe ancestry, with  
305 more Steppe ancestry in Northern Europe and less in Southern Europe (38). Suppose that  
306 environmental variation in stature is also correlated with geography, and that Northern  
307 Europeans are taller than Southern Europeans for entirely non-genetic reasons. Then, GWAS  
308 that do not completely correct for stratification will find that genetic variants that are more  
309 common in Steppe populations than Neolithic populations are associated with increased height.  
310 When these GWAS results are then used to compute PRS for ancient populations, they will  
311 predict that Steppe ancestry populations were genetically taller simply because they are more  
312 closely related to present-day Northern Europeans (21, 22). In this study, we attempted to  
313 avoid this confounding in two ways: first, by computing PRS using GWAS effect sizes from the  
314 UK Biobank—a fairly homogenous dataset that should be well-controlled for population  
315 stratification, and second, by replicating our results after re-estimating the effect sizes within  
316 siblings, which should be robust to population stratification. The tradeoff between these two  
317 methods is that the small sibling sample size means that effect size estimates are noisy, even

318 though they should be unbiased, and our results using sibling-estimated effects may miss subtle  
319 trends. However, we cannot exclude the possibility that some confounding remains, for  
320 example because although we re-estimated effect sizes using the within-siblings design, we still  
321 ascertained loci using the GWAS results. Residual confounding would also tend to create  
322 spurious signals of polygenic adaptation (21, 22).

323  
324 As well as genetic contributions to phenotype, our results shed light on possible environmental  
325 contributions. In some cases, we can make hypotheses about the relationship between  
326 environmental or lifestyle changes, and genetic change. For example, if we interpret change in  
327 femur bending strength as reflecting a decrease in mobility, the coincident Mesolithic/Neolithic  
328 change in heel bone mineral density PRS can be seen as a genetic response to this change.  
329 However, in the Neolithic/post-Neolithic periods, the two observations are decoupled. This  
330 emphasizes the role of developmental plasticity in response to changes in environment, and of  
331 joint interpretation of phenotypic and genetic variables. Even when looking at the same  
332 phenotype, we find cases where genetic predictions and phenotypic data are discordant—for  
333 example in post-Neolithic sitting height. We must therefore be cautious in the interpretation of  
334 predicted genetic patterns where phenotypes cannot be directly measured, even if it is possible  
335 to control stratification. Predicted genetic changes should be used as a baseline, against which  
336 non-genetic effects can be measured and tested.

## 337 Methods

### 338 Ancient DNA and polygenic risk score construction

339 We collected published ancient DNA data from 1122 ancient individuals, taken from 29  
340 publications. The majority of these individuals had been genotyped using an in-solution capture  
341 reagent (“1240k”) that targets 1.24 million single nucleotide polymorphisms (SNPs) across the  
342 genome. Because of the low coverage of most of these samples, the genotype data are pseudo-  
343 haploid. That is, there is only a single allele present for each individual at each site, but alleles at  
344 adjacent sites may come from either of the two chromosomes of the individual. For individuals  
345 with shotgun sequence data, we selected a single read at each 1240k site. We obtained the  
346 date of each individual from the original publication. Most of the samples have been directly  
347 radiocarbon dated, or else are securely dated by context.

348  
349 We obtained GWAS results from the Neale lab UK Biobank page ([http://www.nealelab.is/uk-](http://www.nealelab.is/uk-biobank/)  
350 [biobank/](http://www.nealelab.is/uk-biobank/); Round 1, accessed February and April 2018). To compute PRS, we first took the  
351 intersection of the 1240k sites and the association summary statistics. We then selected a list of  
352 SNPs to use in the PRS by selecting the SNP with the lowest P-value, removing all SNPs within  
353 250kb, and repeating until there were no SNPs remaining with P-value less than  $10^{-6}$ . We then  
354 computed PRS for each individual by taking the sum of genotype multiplied by effect size for all  
355 included SNPs. Where an individual was missing data at a particular SNP, we replaced the SNP  
356 with the average frequency of the SNP across the whole dataset. This has the effect of shrinking  
357 the PRS towards the mean and should be conservative for the identification of differences in  
358 PRS. We confirmed that there was no correlation between missingness and PRS, to make sure  
359 that missing data did not bias the results (correlation between missingness and PRS  $\rho=0.02$ ;  
360  $P=0.44$ , Supplementary Fig. 10). Finally, we normalized the PRS across individuals to have mean  
361 0 and standard deviation 1.

362  
363 We estimated within-family effect sizes from 17,358 sibling pairs in the UK Biobank to obtain  
364 effect estimates that are unaffected by stratification. Pairs of individuals were identified as  
365 siblings if estimates of IBS0 were greater than 0.0018 and kinship coefficients were greater than

366 0.185. Of those pairs, we only retained those where both siblings were classified by UK Biobank  
367 as “white British”, and randomly picked two individuals from families with more than two  
368 siblings. We used Hail (84) to estimate within-sibling pair effect sizes for 1,284,881 SNPs by  
369 regressing pairwise phenotypic differences between siblings against the difference in genotype.  
370 We included pairwise differences of sex (coded as 0/1) and age as covariates, and inverse-rank-  
371 normalized the phenotype before taking the differences between siblings. To combine the  
372 GWAS and sibling results, we first restricted the GWAS results to sites where we had estimated  
373 a sibling effect size and replaced the GWAS effect sizes by the sibling effects. We then restricted  
374 to 1240k sites and constructed PRS in the same way as for the GWAS results.

375  
376 To test whether the differences in the GWAS and GWAS/Sibs PRS results can be explained by  
377 differences in power, we created subsampled GWAS estimates which matched the sibling in the  
378 expected standard errors, by determining the equivalent sample size necessary and randomly  
379 sampling  $N_{sub}$  individuals.  $N_{sub} = \frac{N_{sib}}{2 \text{var}(\delta_{sib})}$  where  $\delta_{sib}$  is the difference in normalized  
380 phenotype between siblings after accounting for the covariates age and sex.

381  
382 [Stature data](#)  
383 We obtained stature data from Ruff (2018) (4) (data file and notes available at  
384 <http://www.hopkinsmedicine.org/fae/CBR.html>), which also includes estimated body mass,  
385 femoral midshaft anteroposterior strength (FZx), and other osteometric dimensions. Statures  
386 and body masses were calculated from linear skeletal measurements using anatomical  
387 reconstruction or sample-specific regression formulae (4, 58). We calculated sitting height as  
388 basion-bregma (cranial) height (BBH) plus vertebral column length (VCL). We restricted analysis  
389 to 1159 individuals dated earlier than 1165 BP (651 males and 508 females), of which 1130 had  
390 estimates for stature, 1014 for FZx and 236 for sitting height. Sitting and standing height were  
391 standardized for sex by adding the mean difference between male and female estimates to all  
392 the female values. Sex differences in stature remain relatively constant over time (4), making it  
393 reasonable to adjust all female heights by the same mean value. For FZx we first standardized

394 for sex as we did for stature then divided each by estimated body mass multiplied by  
395 biomechanical femur length (4).

396

### 397 Grouping

398 We grouped individuals into broad categories based on date and, in some cases, archeological  
399 and genetic context. All individuals were assigned to one time period group, based on median  
400 age estimates of the sample obtained from the original publications. Date ranges for each time  
401 period are based on a combination of historical, climatic, and archaeological factors. The Early  
402 Upper Paleolithic comprises all samples older than 25,000 BP, which roughly coincides with the  
403 end of the last glacial maximum (LGM). The Late Upper Paleolithic begins when the European  
404 glaciers are beginning to recede (25,000 BP) and extends until 11,000 BP and a shift in lithic  
405 technology that is traditionally used to delineate the beginning of the Mesolithic period.  
406 Transitions between the Mesolithic, Neolithic, and Bronze Age are staggered throughout  
407 Europe, so creating universally applicable date ranges is not possible. We instead defined  
408 overlapping transition periods between the Mesolithic and Neolithic periods (8500-5500 BP)  
409 and between the Neolithic and post-Neolithic (5000-3900 BP). For the genetic data, samples in  
410 the overlapping periods were assigned based on genetic population affiliation, inferred using  
411 supervised ADMIXTURE (48, 85, 86) which, in most of Western Europe, corresponds closely to  
412 archaeological context (38, 48). In particular, the Mesolithic/Neolithic overlap was resolved  
413 based on whether each individual had more (Neolithic) or less (Mesolithic) than 50% ancestry  
414 related to northwest Anatolian Neolithic Farmers. The Neolithic/post-Neolithic overlap was  
415 resolved based on whether individuals had more than 25% ancestry related to Bronze Age  
416 Steppe populations (“Steppe ancestry”; See Ref. (86) for more details). For the skeletal data,  
417 group assignment in the overlapping periods was determined by the archaeology of each site.  
418 Broadly, sites belonging to the Neolithic have transitioned to agricultural subsistence. Similarly,  
419 post-Neolithic populations are broadly defined by evidence of metal working (Copper, Bronze  
420 and Iron Ages, and later periods). In particular, we included Late Eneolithic (Copper Age) sites  
421 associated with Corded Ware and Bell Beaker material culture in the post-Neolithic category  
422 but for consistency with the genetic classifications, we included 8 Early Eneolithic (before 4500

423 BP) individuals in the Neolithic category, since this precedes the appearance of Steppe ancestry  
424 in Western Europe. We excluded samples more recent than 1165 BP.

425

## 426 [Linear models](#)

427 We fitted a series of linear models to changes in both PRS and stature data with time. In the  
428 most general model, we allow both the intercept and slope to vary between groups. We then  
429 either force some of the slopes to be zero, or some of the adjacent groups to have identical  
430 parameters. We describe the models using underscores to indicate changes in parameters,  
431 lowercase to indicate slopes (change with respect to time) fixed to zero, and upper case to  
432 indicate free slopes (i.e. linear trends with time). For example, “E\_L\_M\_N\_B” is the most  
433 general model, “elmnb” indicates that all groups have the same mean and there is no change  
434 with time, and “ELMN\_B” indicates that the first four groups share the same parameters, and  
435 the post-Neolithic has different parameters. The models shown in Figures 1 and 2 are  
436 “e\_lmn\_b” (panels a-b), “e\_lm\_nb” (panel c), “ELMN\_B” (panels d-e) and “ELM\_NB” (panel f).  
437 To analyze geographic variation, we used the residuals of the “ELMN\_B” model for the PRS and  
438 “ELM\_NB” for skeletal stature, and fitted regressions against latitude and longitude.

439

## 440 [Polygenic selection test](#)

441 We computed bootstrap P-values for the  $Q_x$  statistic (73) by sampling random sets of SNPs in  
442 matched 5% frequency bins, and re-computing the statistic. Unlike for the PRS calculations, we  
443 ignored missing data, since the  $Q_x$  statistic uses only the population-level estimated allele  
444 frequencies and not individual-level data. We tested a series of nested sets of SNPs (x-axis in  
445 Fig. 6), adding SNPs in 100 SNP batches, ordered by increasing P-value, down to a P-value of  
446 0.1.

## 447 [Acknowledgments](#)

448 I.M. was supported by a Research Fellowship from the Alfred P. Sloan foundation, and a New  
449 Investigator Research Grant from the Charles E. Kaufman Foundation. Skeletal data were  
450 collected in collaboration with Brigitte Holt, Markku Niskanen, Vladimir Sladěk, and Margit  
451 Bernor, with the support of the National Science Foundation (BCS-0642297 and BSC-0642710)

452 and the Grant Agency of the Czech Republic and the Academy of Finland and Finnish Cultural  
453 Foundation. We thank Jeremy Berg and Eva Rosenstock for helpful comments on an earlier  
454 version of the manuscript. This project was initially conceived during discussions at the  
455 workshop "Human stature in the Near East and Europe in a long-term perspective" at the Freie  
456 Universität Berlin 25-27 April 2018, organized as part of the Emmy-Noether-Projekt  
457 "LIVES" funded by the German Research Foundation, Grant Nr. RO4148/1 (PI Eva Rosenstock).  
458  
459

## 460 References

- 461
- 462 1. NCD Risk Factor Collaboration (2016) A century of trends in adult human height. *Elife* 5.
  - 463 2. Hatton TJ & Bray BE (2010) Long run trends in the heights of European men, 19th-20th  
464 centuries. *Econ Hum Biol* 8(3):405-413.
  - 465 3. Arcaleni E (2006) Secular trend and regional differences in the stature of Italians, 1854–  
466 1980. *Economics & Human Biology* 4(1):24-38.
  - 467 4. Ruff CB ed (2018) *Skeletal Variation and Adaptation in Europeans: Upper Paleolithic to*  
468 *the Twentieth Century* (John Wiley and Sons, Hoboken).
  - 469 5. Benazzi S, *et al.* (2011) Early dispersal of modern humans in Europe and implications for  
470 Neanderthal behaviour. *Nature* 479(7374):525-528.
  - 471 6. Higham T, *et al.* (2011) The earliest evidence for anatomically modern humans in  
472 northwestern Europe. *Nature* 479(7374):521-524.
  - 473 7. Rosenstock E, *et al.* (2019) Human Stature in the Near East and Europe ca. 10 000 –  
474 1000 BC: its spatio-temporal development in a Bayesian errors-in-variables model.  
475 *Anthropological and Archaeological Sciences* In press.
  - 476 8. Perkins JM, Subramanian SV, Davey Smith G, & Ozaltin E (2016) Adult height, nutrition,  
477 and population health. *Nutr Rev* 74(3):149-165.
  - 478 9. Rosenstock E, Groß M, Hujic A, & Scheibner A (2015) Back to good shape: biological  
479 standard of living in the Copper and Bronze ages and the possible role of food. *The third*  
480 *food revolution? Setting the bronze age table: common trends in economic and*  
481 *subsistence strategies in bronze age europe*, eds Kneisel J, Dal Corso M, Kirleis W, Scholz  
482 H, Taylor N, & Tiedtke V (Dr. Rudolph Habelt GmbH, Bonn), pp 121-152.
  - 483 10. Galton F (1886) Regression Towards Mediocrity in Hereditary Stature. *The Journal of the*  
484 *Anthropological Institute of Great Britain and Ireland* 15:246-263.
  - 485 11. Lettre G (2011) Recent progress in the study of the genetics of height. *Hum Genet*  
486 129(5):465-472.
  - 487 12. Fisher RA (1918) The correlation between relatives on the supposition of Mendelian  
488 inheritance. *Trans Roy Soc Edin.* 52:399-433.



- 489 13. Silventoinen K, *et al.* (2003) Heritability of adult body height: a comparative study of  
490 twin cohorts in eight countries. *Twin Res* 6(5):399-408.
- 491 14. Visscher PM, Hill WG, & Wray NR (2008) Heritability in the genomics era--concepts and  
492 misconceptions. *Nat Rev Genet* 9(4):255-266.
- 493 15. Wood AR, *et al.* (2014) Defining the role of common variation in the genomic and  
494 biological architecture of adult human height. *Nat Genet* 46(11):1173-1186.
- 495 16. Yengo L, *et al.* (2018) Meta-analysis of genome-wide association studies for height and  
496 body mass index in approximately 700000 individuals of European ancestry. *Hum Mol*  
497 *Genet* 27(20):3641-3649.
- 498 17. Lango Allen H, *et al.* (2010) Hundreds of variants clustered in genomic loci and biological  
499 pathways affect human height. *Nature* 467(7317):832-838.
- 500 18. Marouli E, *et al.* (2017) Rare and low-frequency coding variants alter human adult  
501 height. *Nature* 542(7640):186-190.
- 502 19. Martin AR, *et al.* (2019) Clinical use of current polygenic risk scores may exacerbate  
503 health disparities. *Nat Genet* 51(4):584-591.
- 504 20. Martin AR, *et al.* (2017) Human Demographic History Impacts Genetic Risk Prediction  
505 across Diverse Populations. *Am J Hum Genet* 100(4):635-649.
- 506 21. Berg JJ, *et al.* (2018) Reduced signal for polygenic adaptation of height in UK Biobank.  
507 *bioRxiv* <https://doi.org/10.1101/354951>.
- 508 22. Sohail M, *et al.* (2018) Signals of polygenic adaptation on height have been  
509 overestimated due to uncorrected population structure in genome-wide association  
510 studies. *bioRxiv* <https://doi.org/10.1101/355057>.
- 511 23. Skoglund P & Mathieson I (2018) Ancient Genomics of Modern Humans: The First  
512 Decade. *Annu Rev Genomics Hum Genet* 19:381-404.
- 513 24. Marciniak S & Perry GH (2017) Harnessing ancient genomes to study the history of  
514 human adaptation. *Nat Rev Genet* 18(11):659-674.
- 515 25. Slatkin M & Racimo F (2016) Ancient DNA and human history. *Proc Natl Acad Sci U S A*  
516 113(23):6380-6387.
- 517 26. Wilde S, *et al.* (2014) Direct evidence for positive selection of skin, hair, and eye  
518 pigmentation in Europeans during the last 5,000 y. *Proceedings of the National Academy*  
519 *of Sciences* 111(13):4832-4837.
- 520 27. Allentoft ME, *et al.* (2015) Population genomics of Bronze Age Eurasia. *Nature*  
521 522(7555):167-172.
- 522 28. Burger J, Kirchner M, Bramanti B, Haak W, & Thomas MG (2007) Absence of the lactase-  
523 persistence-associated allele in early Neolithic Europeans. *Proc Natl Acad Sci U S A*  
524 104(10):3736-3741.
- 525 29. Mathieson I, *et al.* (2015) Genome-wide patterns of selection in 230 ancient Eurasians.  
526 *Nature* 528(7583):499-503.
- 527 30. Martiniano R, *et al.* (2017) The population genomics of archaeological transition in west  
528 Iberia: Investigation of ancient substructure using imputation and haplotype-based  
529 methods. *PLoS Genet* 13(7):e1006852.
- 530 31. Berg JJ, Zhang X, & Coop G (2017) Polygenic Adaptation has Impacted Multiple  
531 Anthropometric Traits. *bioRxiv*:<https://doi.org/10.1101/167551>.

- 532 32. Cassidy LM, *et al.* (2016) Neolithic and Bronze Age migration to Ireland and  
533 establishment of the insular Atlantic genome. *Proceedings of the National Academy of*  
534 *Sciences* 113(2):368-373.
- 535 33. Fu Q, *et al.* (2016) The genetic history of Ice Age Europe. *Nature* 534(7606):200-205.
- 536 34. Gamba C, *et al.* (2014) Genome flux and stasis in a five millennium transect of European  
537 prehistory. *Nat Commun* 5.
- 538 35. González-Fortes G, *et al.* (2017) Paleogenomic Evidence for Multi-generational Mixing  
539 between Neolithic Farmers and Mesolithic Hunter-Gatherers in the Lower Danube  
540 Basin. *Current Biology*.
- 541 36. Gunther T, *et al.* (2018) Population genomics of Mesolithic Scandinavia: Investigating  
542 early postglacial migration routes and high-latitude adaptation. *PLoS Biol*  
543 16(1):e2003703.
- 544 37. Gunther T, *et al.* (2015) Ancient genomes link early farmers from Atapuerca in Spain to  
545 modern-day Basques. *Proc Natl Acad Sci U S A* 112(38):11917-11922.
- 546 38. Haak W, *et al.* (2015) Massive migration from the steppe is a source for Indo-European  
547 languages in Europe. *Nature* 522(7555):207-211.
- 548 39. Hofmanová Z, *et al.* (2016) Early farmers from across Europe directly descended from  
549 Neolithic Aegeans. *Proceedings of the National Academy of Sciences* 113(25):6886-6891.
- 550 40. Jones ER, *et al.* (2015) Upper Palaeolithic genomes reveal deep roots of modern  
551 Eurasians. *Nature communications* 6.
- 552 41. Jones ER, *et al.* (2017) The Neolithic Transition in the Baltic Was Not Driven by  
553 Admixture with Early European Farmers. *Curr Biol* 27(4):576-582.
- 554 42. Keller A, *et al.* (2012) New insights into the Tyrolean Iceman's origin and phenotype as  
555 inferred by whole-genome sequencing. *Nat Commun* 3:698.
- 556 43. Kılınc Gülşah M, *et al.* (2016) The Demographic Development of the First Farmers in  
557 Anatolia. *Current Biology* 26(19):2659-2666.
- 558 44. Lazaridis I, *et al.* (2017) Genetic origins of the Minoans and Mycenaeans. *Nature*  
559 548(7666):214-218.
- 560 45. Lazaridis I, *et al.* (2014) Ancient human genomes suggest three ancestral populations for  
561 present-day Europeans. *Nature* 513(7518):409-413.
- 562 46. Lipson M, *et al.* (2017) Parallel ancient genomic transects reveal complex population  
563 history of early European farmers. *bioRxiv*:114488.
- 564 47. Martiniano R, *et al.* (2016) Genomic signals of migration and continuity in Britain before  
565 the Anglo-Saxons. *Nature communications* 7:10326.
- 566 48. Mathieson I, *et al.* (2018) The genomic history of southeastern Europe. *Nature*  
567 555(7695):197-203.
- 568 49. Olalde I, *et al.* (2014) Derived immune and ancestral pigmentation alleles in a 7,000-  
569 year-old Mesolithic European. *Nature* advance online publication.
- 570 50. Olalde I, *et al.* (2018) The Beaker phenomenon and the genomic transformation of  
571 northwest Europe. *Nature* 555(7695):190-196.
- 572 51. Olalde I, *et al.* (2015) A Common Genetic Origin for Early Farmers from Mediterranean  
573 Cardial and Central European LBK Cultures. *Molecular Biology and Evolution*  
574 32(12):3132-3142.

- 575 52. Omrak A, *et al.* (2016) Genomic Evidence Establishes Anatolia as the Source of the  
576 European Neolithic Gene Pool. *Curr Biol* 26(2):270-275.
- 577 53. Saag L, *et al.* (2017) Extensive Farming in Estonia Started through a Sex-Biased Migration  
578 from the Steppe. *Curr Biol* 27(14):2185-2193 e2186.
- 579 54. Schiffels S, *et al.* (2016) Iron age and Anglo-Saxon genomes from East England reveal  
580 British migration history. *Nature communications* 7:10408.
- 581 55. Sikora M, *et al.* (2017) Ancient genomes show social and reproductive behavior of early  
582 Upper Paleolithic foragers. *Science* 358(6363):659-662.
- 583 56. Skoglund P, *et al.* (2014) Genomic Diversity and Admixture Differs for Stone-Age  
584 Scandinavian Foragers and Farmers. *Science* 344(6185):747-750.
- 585 57. Veeramah KR, *et al.* (2018) Population genomic analysis of elongated skulls reveals  
586 extensive female-biased immigration in Early Medieval Bavaria. *Proc Natl Acad Sci U S A*  
587 115(13):3494-3499.
- 588 58. Ruff CB, *et al.* (2012) Stature and body mass estimation from skeletal remains in the  
589 European Holocene. *Am J Phys Anthropol* 148(4):601-617.
- 590 59. Skoglund P, *et al.* (2012) Origins and genetic legacy of Neolithic farmers and hunter-  
591 gatherers in Europe. *Science* 336(6080):466-469.
- 592 60. Chan Y, *et al.* (2015) Genome-wide Analysis of Body Proportion Classifies Height-  
593 Associated Variants by Mechanism of Action and Implicates Genes Important for  
594 Skeletal Development. *Am J Hum Genet* 96(5):695-708.
- 595 61. Ruff CB (2002) Variation in Human Body Size and Shape. *Annual Review of Anthropology*  
596 31:211-232.
- 597 62. Allen JA (1887) The influence of physical conditions in the genesis of species. *Radical*  
598 *Review* 1:108-140.
- 599 63. Bergman C (1847) Über die Verhältnisse der Wärmeökonomie der Thiere zu ihrer  
600 Grösse. *Göttinger Studien* 3:595-708.
- 601 64. Formicola V & Giannecchini M (1999) Evolutionary trends of stature in upper Paleolithic  
602 and Mesolithic Europe. *J Hum Evol* 36(3):319-333.
- 603 65. Chirchir H, *et al.* (2015) Recent origin of low trabecular bone density in modern humans.  
604 *Proc Natl Acad Sci U S A* 112(2):366-371.
- 605 66. Chirchir H, Ruff CB, Junno JA, & Potts R (2017) Low trabecular bone density in recent  
606 sedentary modern humans. *Am J Phys Anthropol* 162(3):550-560.
- 607 67. Pettersson U, Nilsson M, Sundh V, Mellstrom D, & Lorentzon M (2010) Physical activity is  
608 the strongest predictor of calcaneal peak bone mass in young Swedish men. *Osteoporos*  
609 *Int* 21(3):447-455.
- 610 68. Bauer DC, *et al.* (2007) Quantitative ultrasound predicts hip and non-spine fracture in  
611 men: the MrOS study. *Osteoporos Int* 18(6):771-777.
- 612 69. Bauer DC, *et al.* (1997) Broadband ultrasound attenuation predicts fractures strongly  
613 and independently of densitometry in older women. A prospective study. Study of  
614 Osteoporotic Fractures Research Group. *Arch Intern Med* 157(6):629-634.
- 615 70. Kneissel M, *et al.* (1994) Age- and sex-dependent cancellous bone changes in a 4000y BP  
616 population. *Bone* 15(5):539-545.

- 617 71. Ruff CB (2019) Biomechanical analyses of archaeological human skeletal samples.  
618 *Biological Anthropology of the Human Skeleton*, eds Katzenburg MA & Grauer AL (John  
619 Wiley and Sons, New York), 3rd Ed, pp 189-224.
- 620 72. Ruff CB, *et al.* (2015) Gradual decline in mobility with the adoption of food production in  
621 Europe. *Proc Natl Acad Sci U S A* 112(23):7147-7152.
- 622 73. Berg JJ & Coop G (2014) A population genetic signal of polygenic adaptation. *PLoS Genet*  
623 10(8):e1004412.
- 624 74. Ruff CB, Trinkaus E, & Holliday TW (1997) Body mass and encephalization in Pleistocene  
625 Homo. *Nature* 387(6629):173-176.
- 626 75. Holliday TW (1997) Body proportions in Late Pleistocene Europe and modern human  
627 origins. *J Hum Evol* 32(5):423-448.
- 628 76. Formicola V & Holt BM (2007) Resource availability and stature decrease in Upper  
629 Palaeolithic Europe. *Journal of Anthropological Sciences* 85:147-155.
- 630 77. Roseman CC & Auerbach BM (2015) Ecogeography, genetics, and the evolution of  
631 human body form. *J Hum Evol* 78:80-90.
- 632 78. Savell KR, Auerbach BM, & Roseman CC (2016) Constraint, natural selection, and the  
633 evolution of human body form. *Proc Natl Acad Sci U S A* 113(34):9492-9497.
- 634 79. Poznik GD, *et al.* (2016) Punctuated bursts in human male demography inferred from  
635 1,244 worldwide Y-chromosome sequences. *Nat Genet* 48(6):593-599.
- 636 80. Karmin M, *et al.* (2015) A recent bottleneck of Y chromosome diversity coincides with a  
637 global change in culture. *Genome Res* 25(4):459-466.
- 638 81. Gilman A (1981) The Development of Social Stratification in Bronze Age Europe. *Current*  
639 *Anthropology* 22:1-23.
- 640 82. Mallory J & Adams DQ eds (1997) *Encyclopedia of Indo-European Culture* (Routledge,  
641 London).
- 642 83. Novembre J, *et al.* (2008) Genes mirror geography within Europe. *Nature*  
643 456(7219):274-274.
- 644 84. Hail Team (2019) Hail. pp <https://github.com/hail-is/hail/releases/tag/0.2.13>.
- 645 85. Alexander DH, Novembre J, & Lange K (2009) Fast model-based estimation of ancestry in  
646 unrelated individuals. *Genome Res* 19(9):1655-1664.
- 647 86. Mathieson S & Mathieson I (2018) FADS1 and the Timing of Human Adaptation to  
648 Agriculture. *Mol Biol Evol* 35(12):2957-2970.
- 649  
650  
651

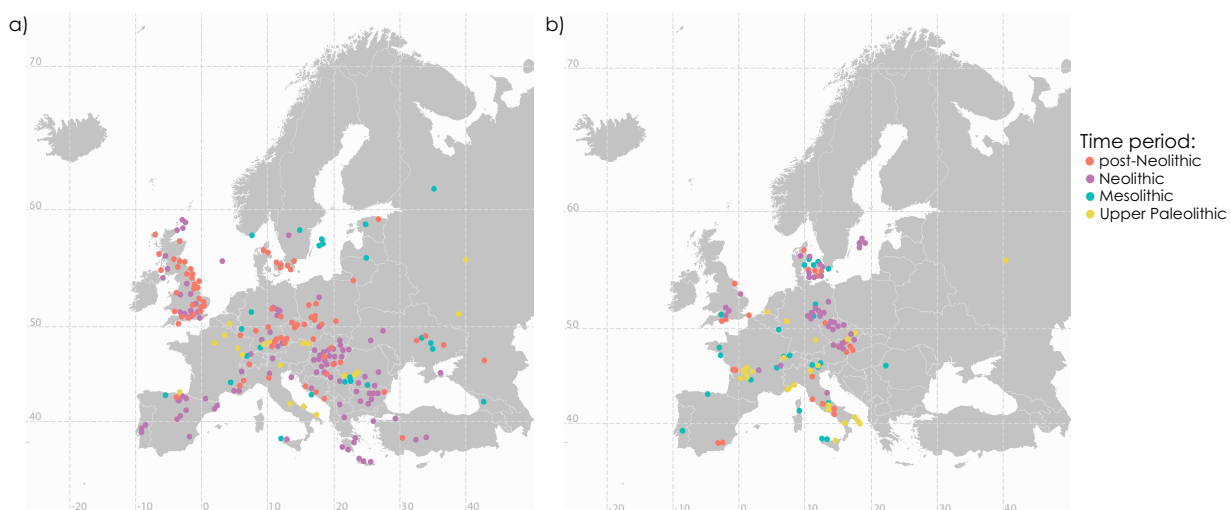

**Supplementary Figure 1:** Locations of samples, colored by time period. **a)** ancient DNA samples; **b)** skeletal samples.

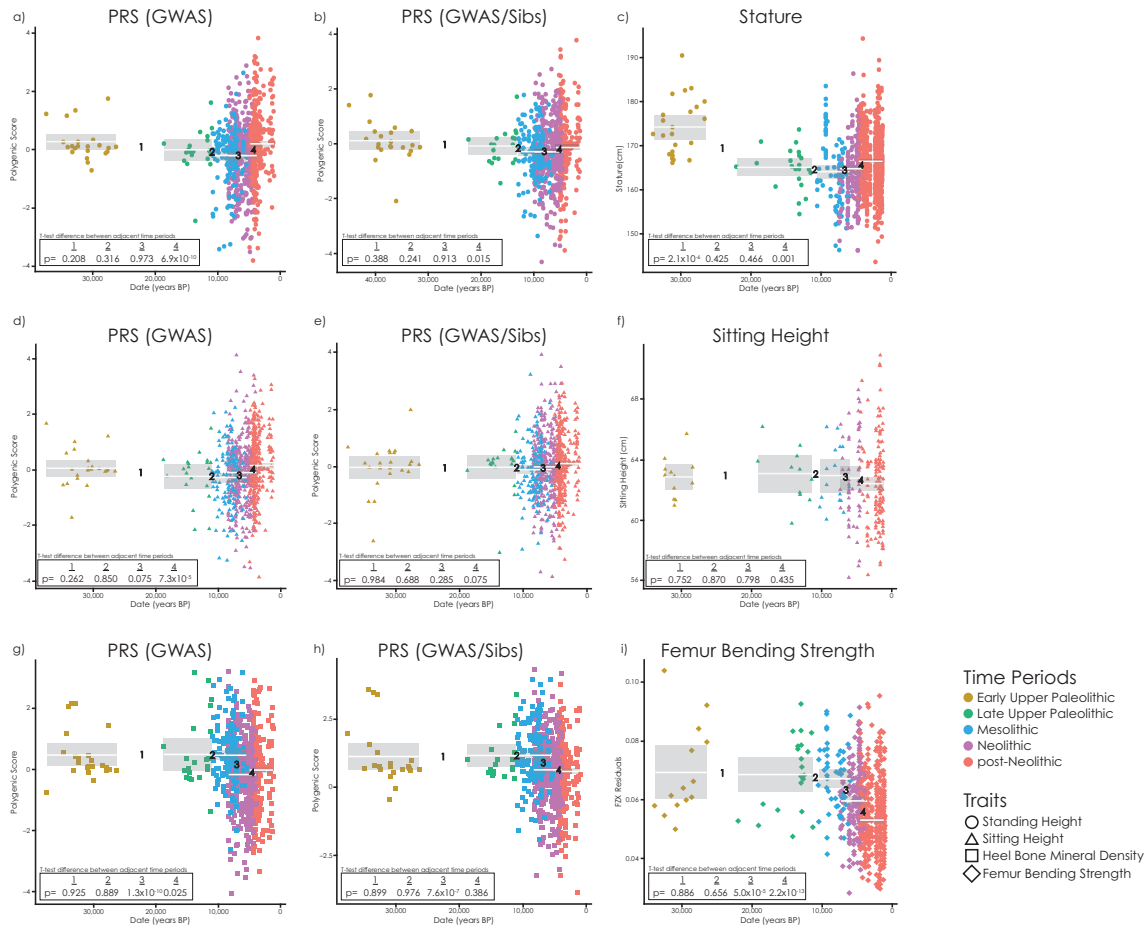

**Supplementary Figure 2:** Changes in PRS and skeletal phenotypes through time, with constant values in each time period. Each point is an ancient individual, lines show fitted values, grey area is the 95% confidence interval, and boxes show p-values for difference in means between adjacent groups. **a)** Standing height PRS(GWAS); **b)** Standing height PRS(GWAS/Sibs); **c)** Stature (skeletal); **d)** Sitting height PRS(GWAS); **e)** Sitting height PRS(GWAS/Sibs); **f)** Sitting height (skeletal); **g)** Heel bone mineral density PRS(GWAS); **h)** Heel bone mineral density PRS(GWAS/Sibs); **i)** Femur bending strength (skeletal).

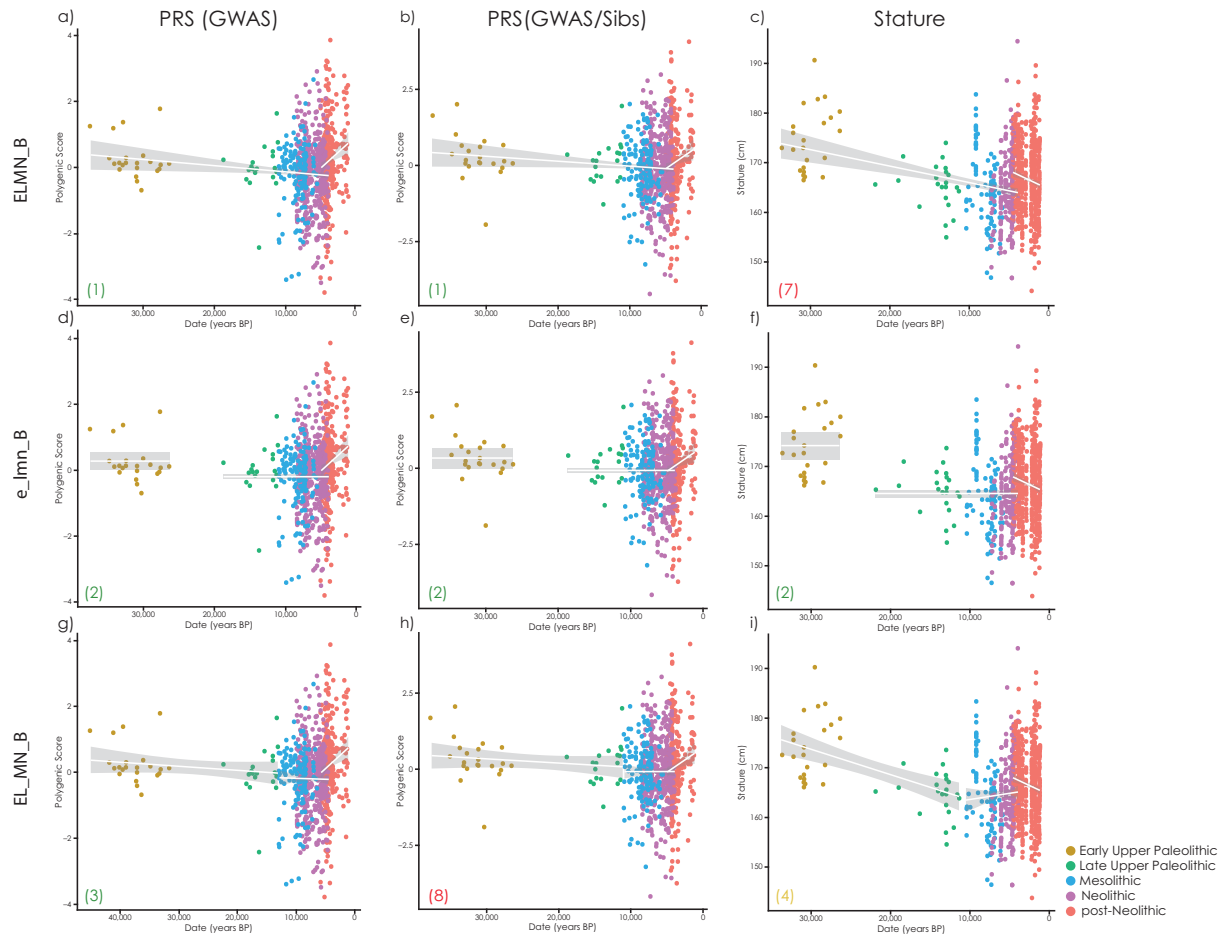

**Supplementary Figure 3:** Top three AIC models for PRS(GWAS), and the corresponding models for PRS(GWAS/Sibs) and skeletal stature. Row name indicates the model being tested, lowercase letters use fixed values for that time period, uppercase letters indicate the values were allowed to vary linearly with time. Number in the lower left corner of each plot indicates its place in the AIC ranking for PRS(GWAS), PRS(GWAS/Sibs) and Stature, green color indicates a good fit (rank 1-3/29 models), yellow a medium fit (rank 4-6/29 models), and red a poor fit (rank 7 or lower out of 29 models).

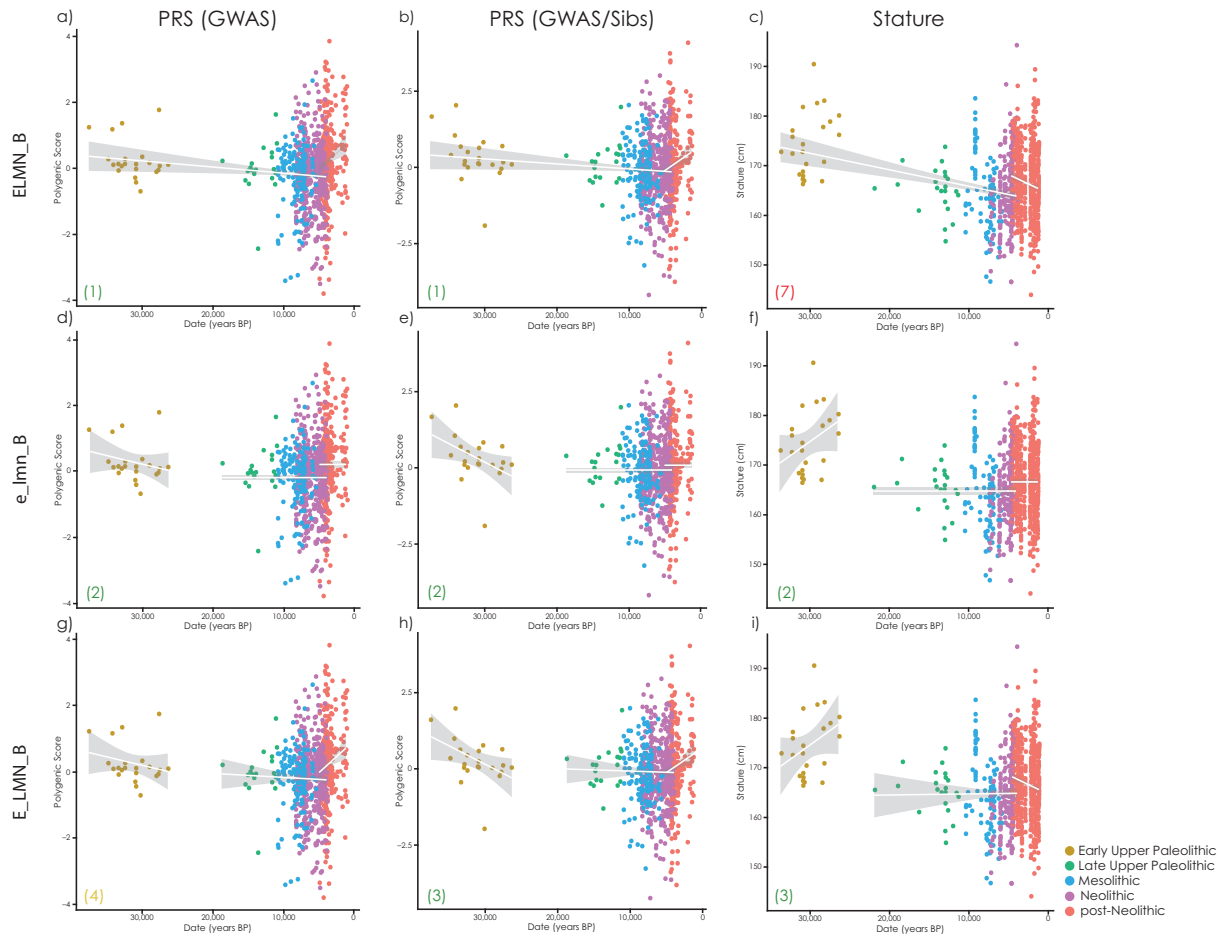

**Supplementary Figure 4:** Top three AIC models for PRS(GWAS/Sibs), and the corresponding models for PRS(GWAS) and skeletal stature. Row name indicates the model being tested, lowercase letters use fixed values for that time period, uppercase letters indicate the values were allowed to vary linearly with time. Number in the lower left corner of each plot indicates its place in the AIC ranking for PRS(GWAS), PRS(GWAS/Sibs) and Stature, green color indicates a good fit (rank 1-3/29 models), yellow a medium fit (rank 4-6/29 models), and red a poor fit (rank 7 or lower out of 29 models).



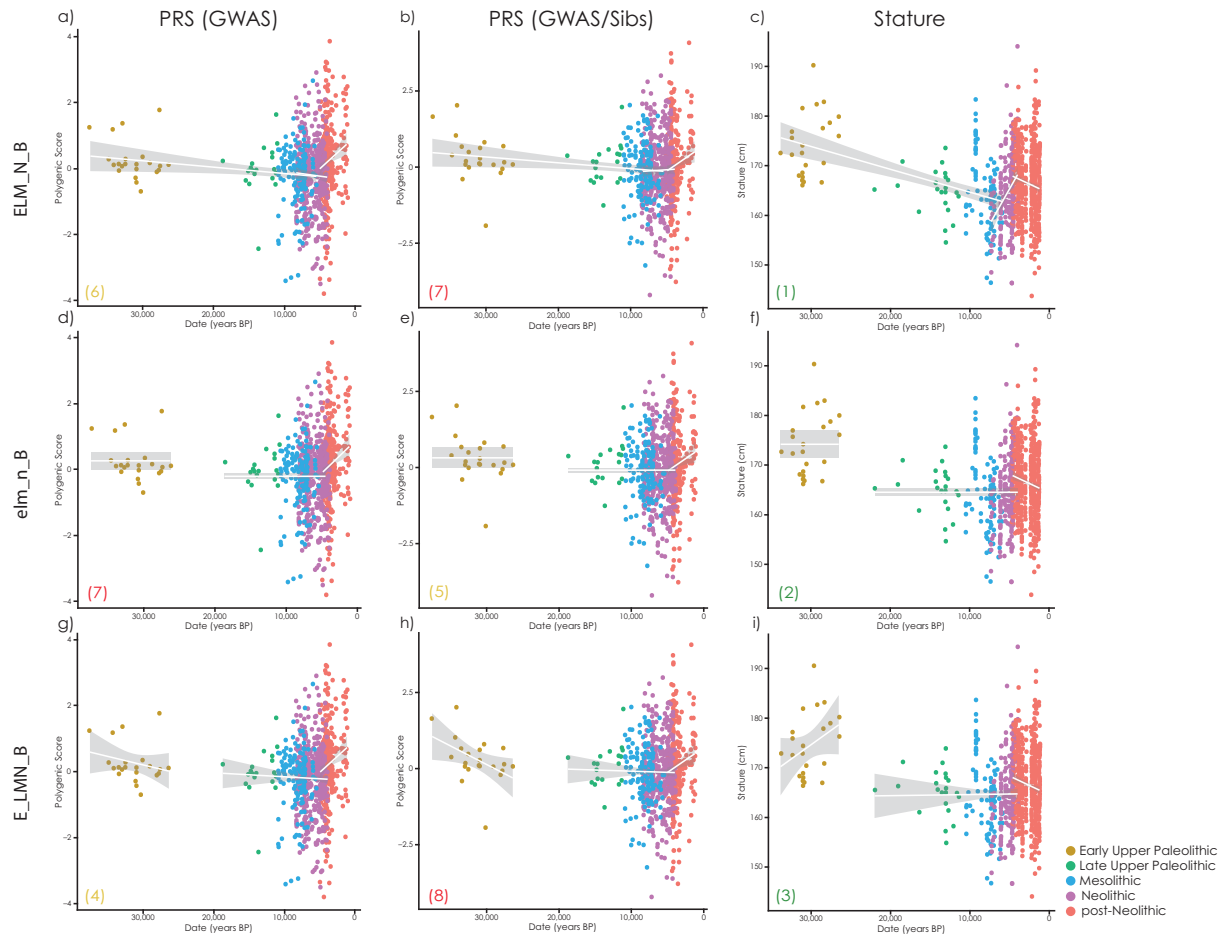

**Supplementary Figure 5:** Top three AIC models for stature, and the corresponding models for PRS(GWAS) and PRS(GWAS/Sibs). Row name indicates the model being tested, lowercase letters use fixed values for that time period, uppercase letters indicate the values were allowed to vary linearly with time. Number in the lower left corner of each plot indicates its place in the AIC ranking for PRS(GWAS), PRS(GWAS/Sibs) and Stature, green color indicates a good fit (rank 1-3/29 models), yellow a medium fit (rank 4-6/29 models), and red a poor fit (rank 7 or lower out of 29 models).

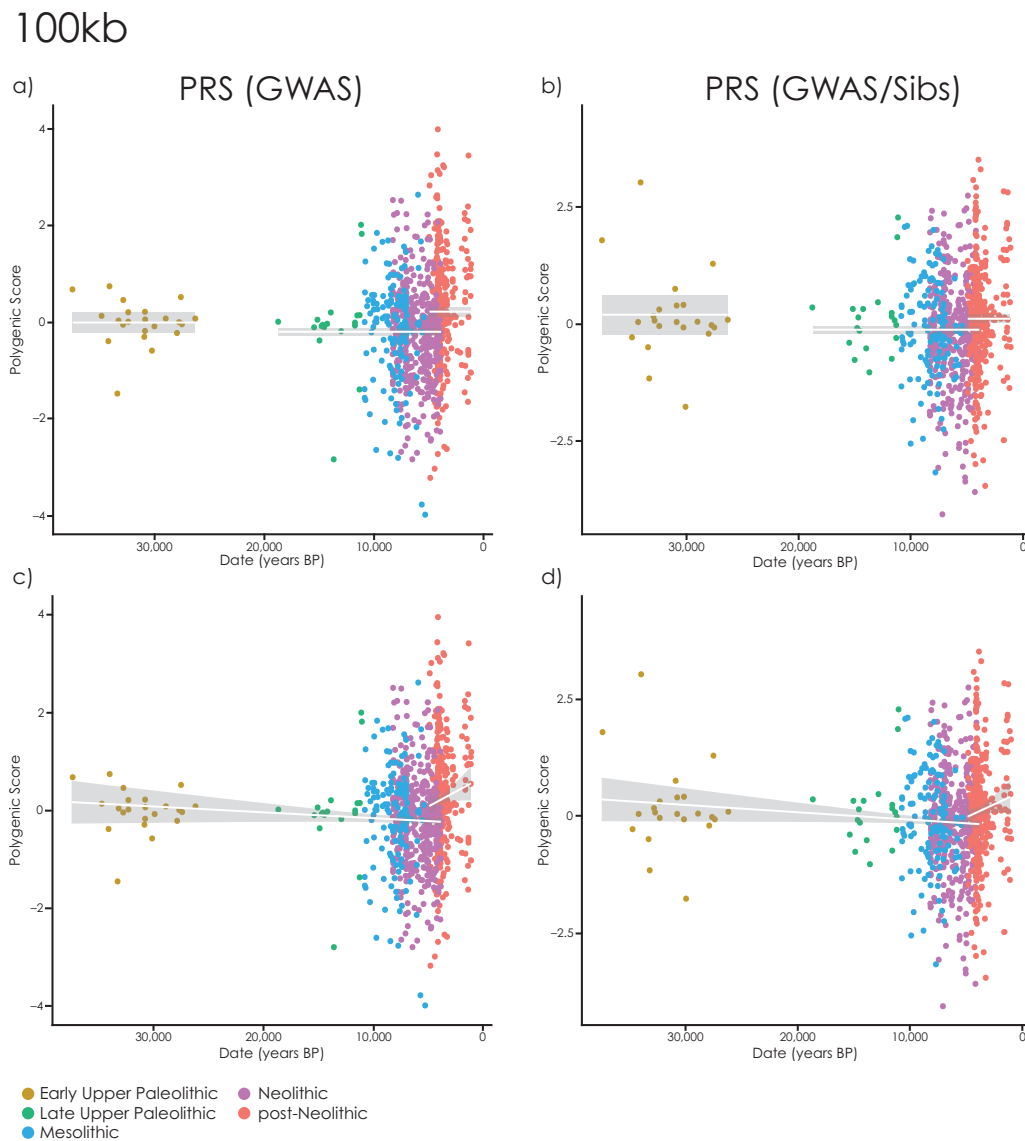

**Supplementary Figure 6:** Changes in standing height PRS through time with PRS constructed using 100kb clumping windows. Each point is an ancient individual, lines show fitted values, grey area is the 95% confidence interval. **a-b)** Constant values in the EUP, LUP-Neolithic and post-Neolithic; **c-d)** A linear trend with time between EUP-Neolithic and a different trend in the post-Neolithic.

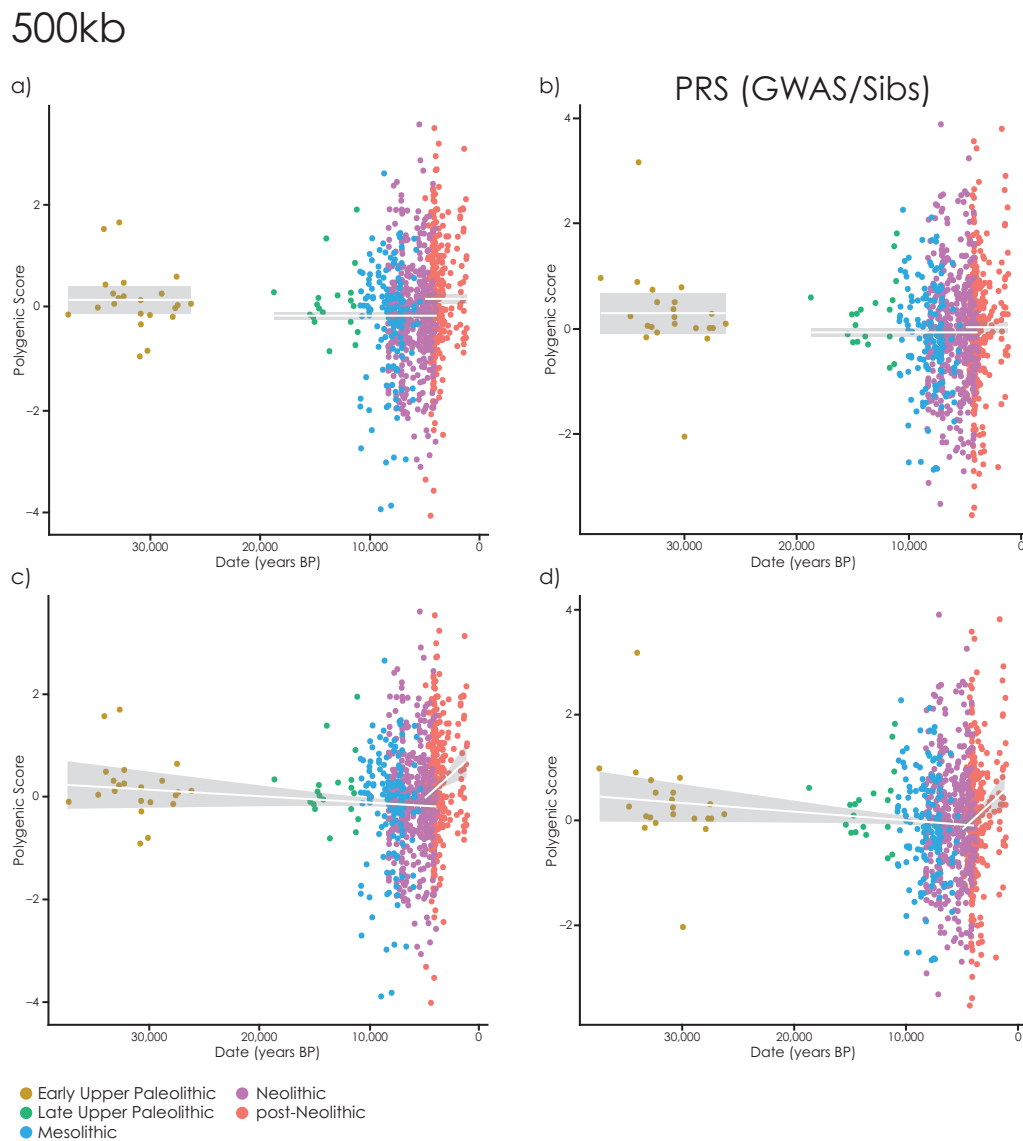

**Supplementary Figure 7:** Changes in standing height PRS through time with PRS constructed using 500kb clumping windows. Each point is an ancient individual, lines show fitted values, grey area is the 95% confidence interval. **a-b)** Constant values in the EUP, LUP-Neolithic and post-Neolithic; **c-d)** A linear trend with time between EUP-Neolithic and a different trend in the post-Neolithic.

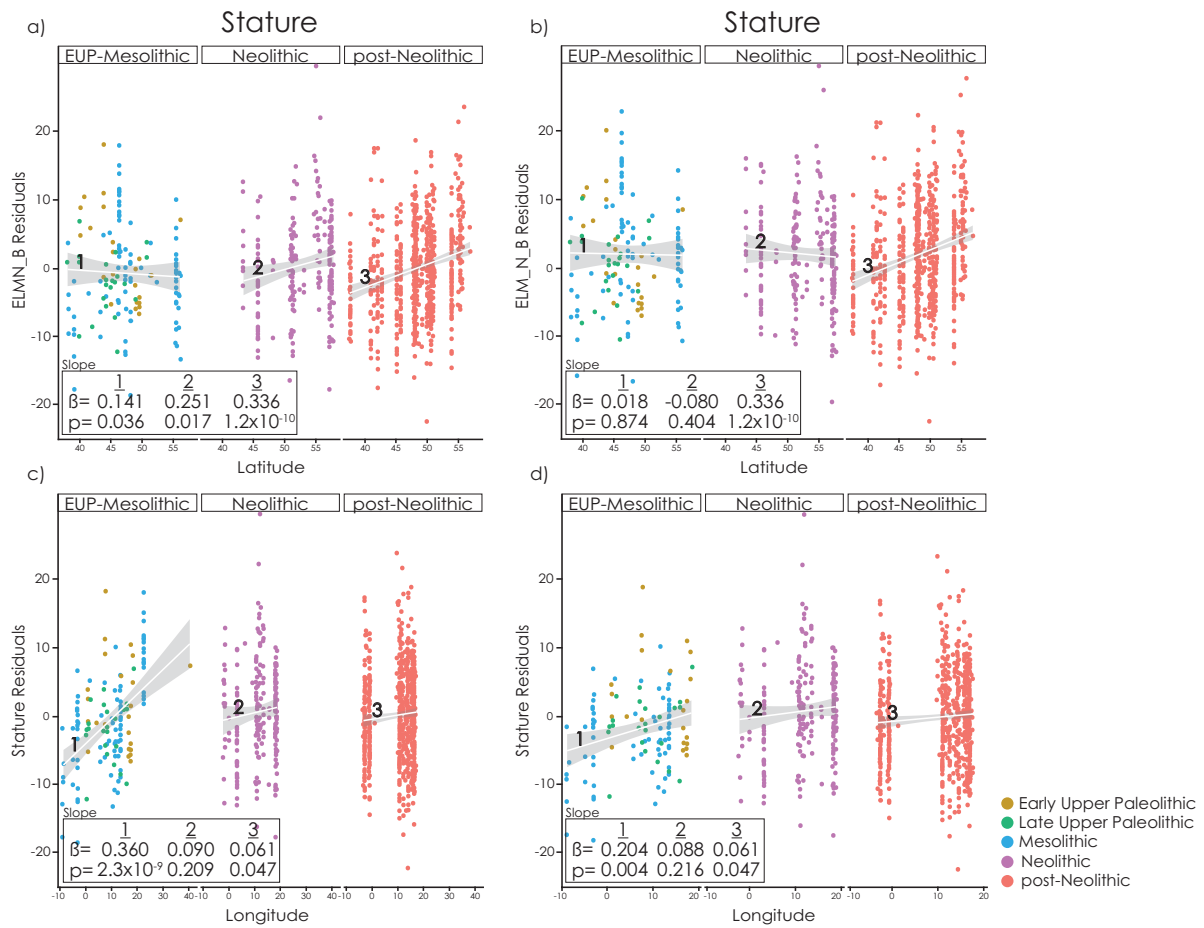

**Supplementary Figure 8:** Geographic gradients in stature under different models. Here we show EUP-Mesolithic, Neolithic and post-Neolithic periods separately, instead of EUP-Neolithic and post-Neolithic as in the main text. **a)** Latitudinal gradient using residuals of the ELMN\_B model (Fig. 1f). **b)** Latitudinal gradient using residuals of the ELM\_N\_B model (Supplementary Fig. 5c). Note that there is no longer a gradient in the Neolithic, so the apparent geographic gradient can equally be explained by temporal change interacting with sampling. **c)** Longitudinal gradient using residuals of the ELMN\_B model (Fig. 1f); the gradient is steepest in the Mesolithic and earlier. **d)** Longitudinal gradient with relatively tall Eastern Mesolithic and Paleolithic samples removed.

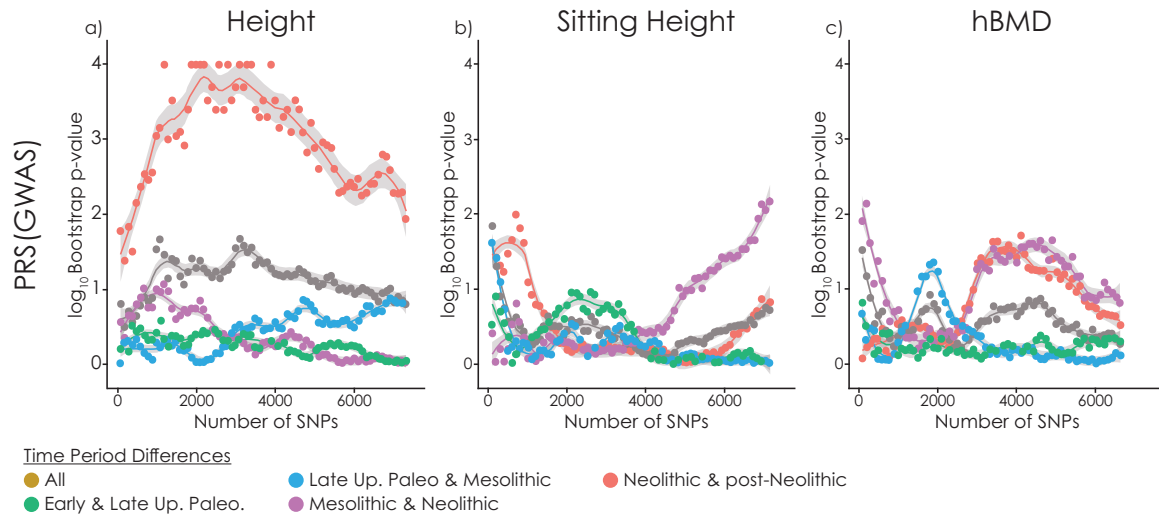

**Supplementary Figure 9:** Selection test as in Figure 6, but using GWAS results generated on a subsample of individuals so that the standard error of the effect size estimates is the same as the standard error of the within-sibling pair estimates.

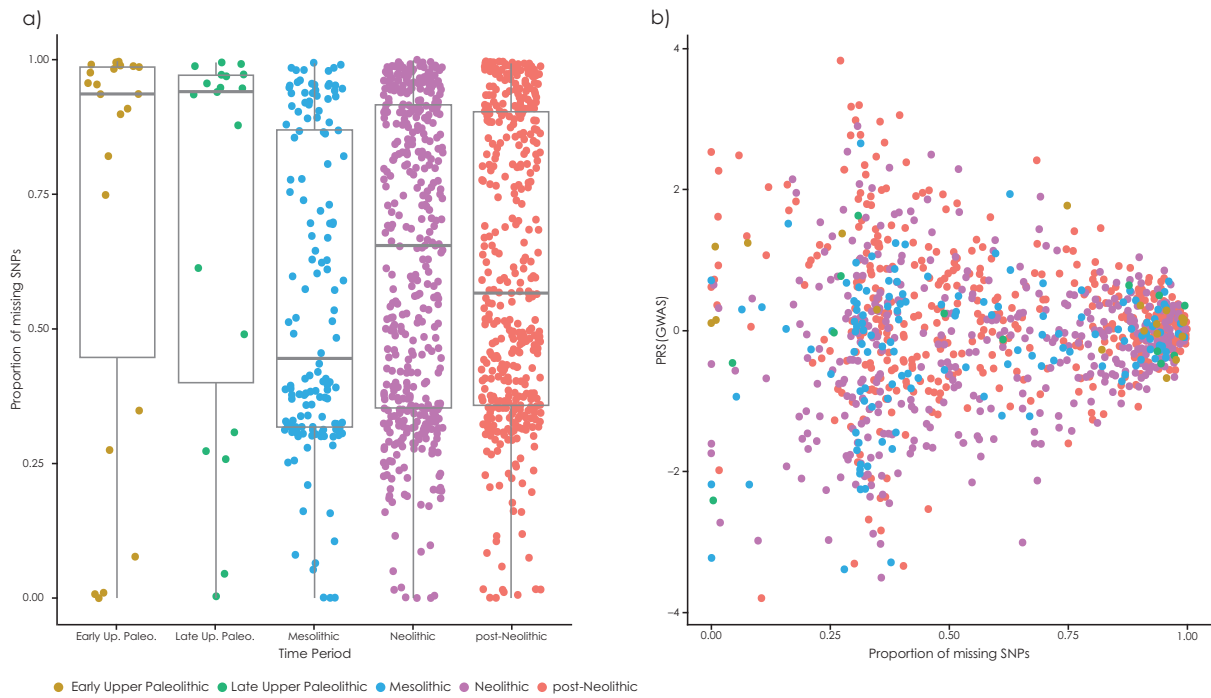

**Supplementary Figure 10:** Effect of missing data on PRS. a) proportion of missing data as a function of group. b) PRS(GWAS) as a function of missing data proportion.
